# Supplementary material for: DFT/TDDFTin silicodesign of ullazine-derived D–π–A–π–A dye photosensitiser
Source: Royal Society of Chemistry journal article supplement (doi:10.1039/d3nj00519d), 2023-01-01
Supplement: d3nj00519d1.pdf [file d3nj00519d1.pdf]

## Supporting Information

### DFT/TDDFT in silico design of ullazine-derived D- $\pi$ -A- $\pi$ -A dye photosensitiser

Jing Huang<sup>1\*</sup>, Lei Yang<sup>1</sup>, Zhangxu Chen<sup>2</sup>, Yikun Zhou<sup>3</sup>, Shasha Zeng<sup>1</sup>

*1. Fujian Provincial Key Laboratory of Ecology-Toxicological Effects & Control for Emerging Contaminants, College of Environmental and Biological Engineering, Putian University, Putian, Fujian 351100, China.*

*2. Key Laboratory of Ecological Environment and Information Atlas, Fujian Provincial University, Putian, Fujian 351100, China.*

*3. College of Chemical Engineering, Huaqiao University, Xiamen, Fujian, 361021, China.*

\* corresponding author: [jinghuang@ptu.edu.cn](mailto:jinghuang@ptu.edu.cn)

#### SUMMARY

|                                                                  |           |
|------------------------------------------------------------------|-----------|
| <b>S1. Frontier molecular orbitals</b> .....                     | <b>S2</b> |
| <b>S2. UV-Vis spectroscopy</b> .....                             | <b>S4</b> |
| <b>S3. Fragmentation Scheme of TDM analysis</b> .....            | <b>S5</b> |
| <b>S4. Heat maps of fragment transition density matrix</b> ..... | <b>S6</b> |
| <b>S5. DFT optimized cartesian coordinates</b> .....             | <b>S7</b> |

## S1. Frontier molecular orbitals

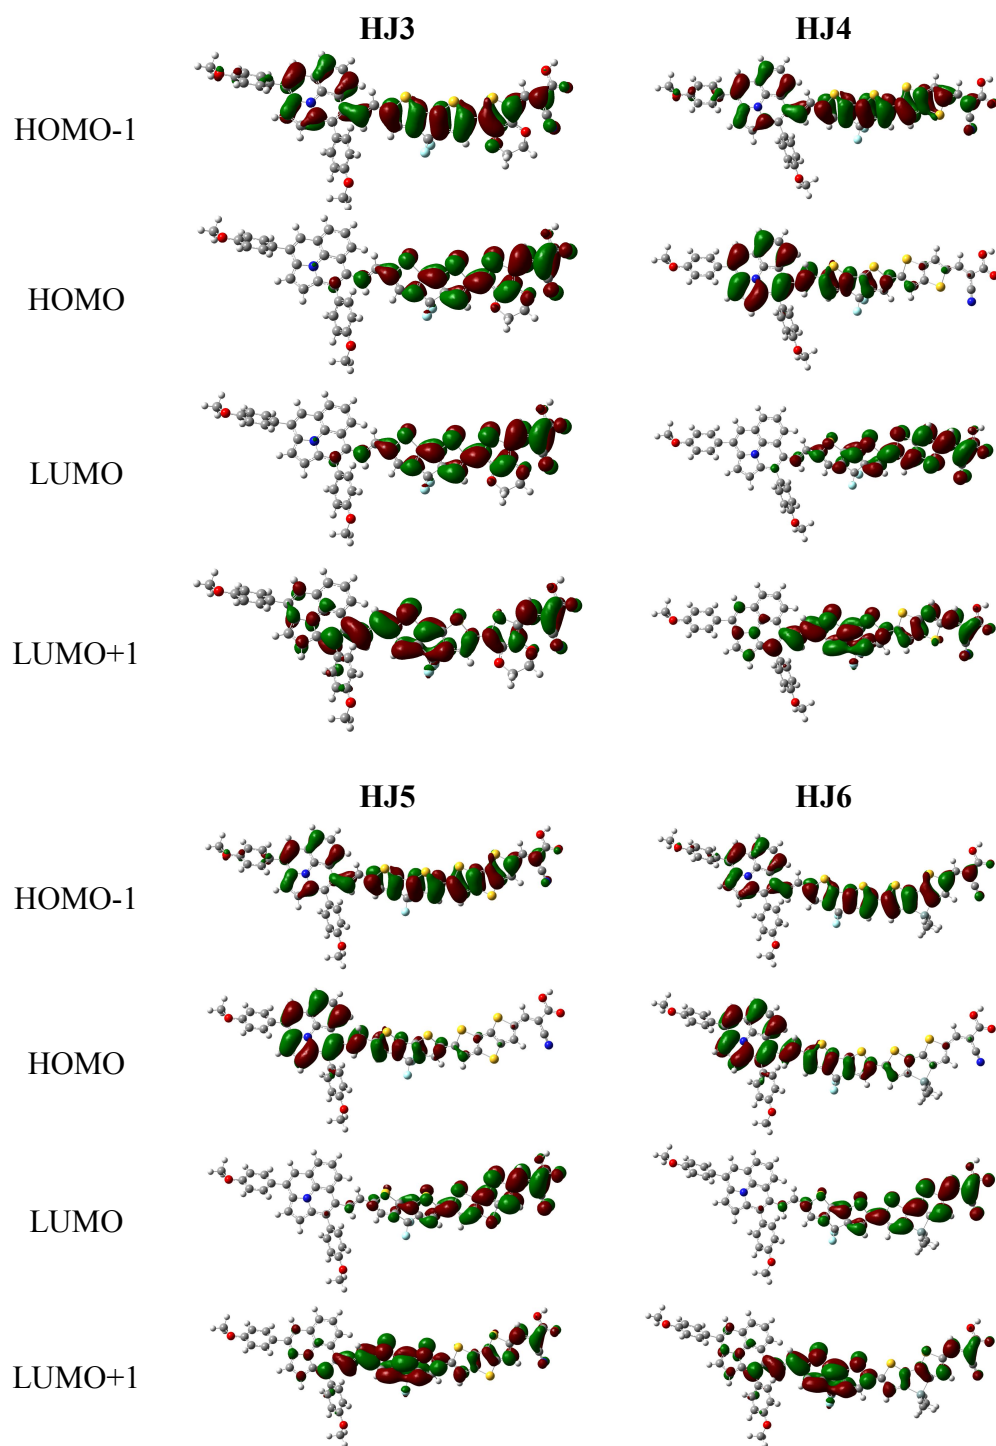

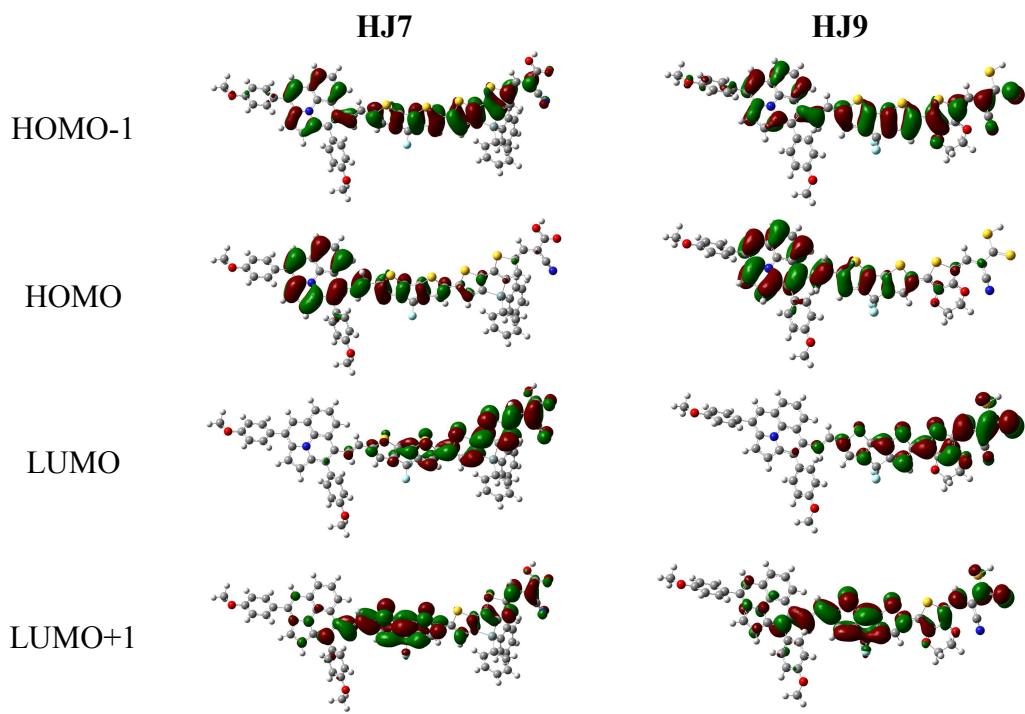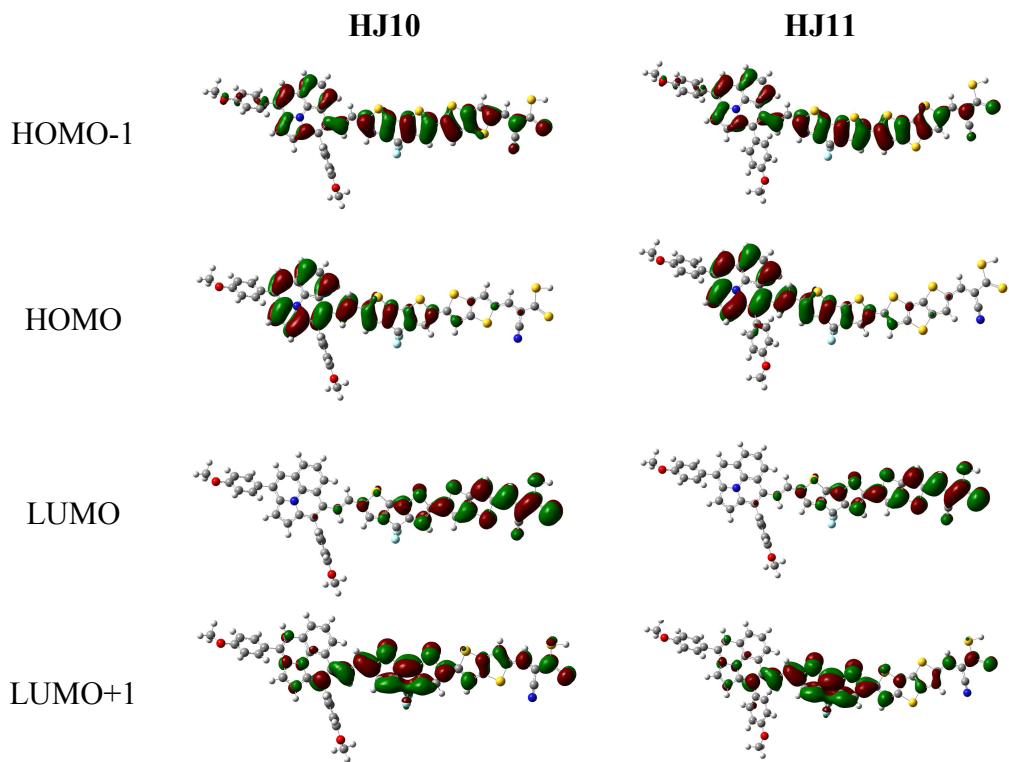

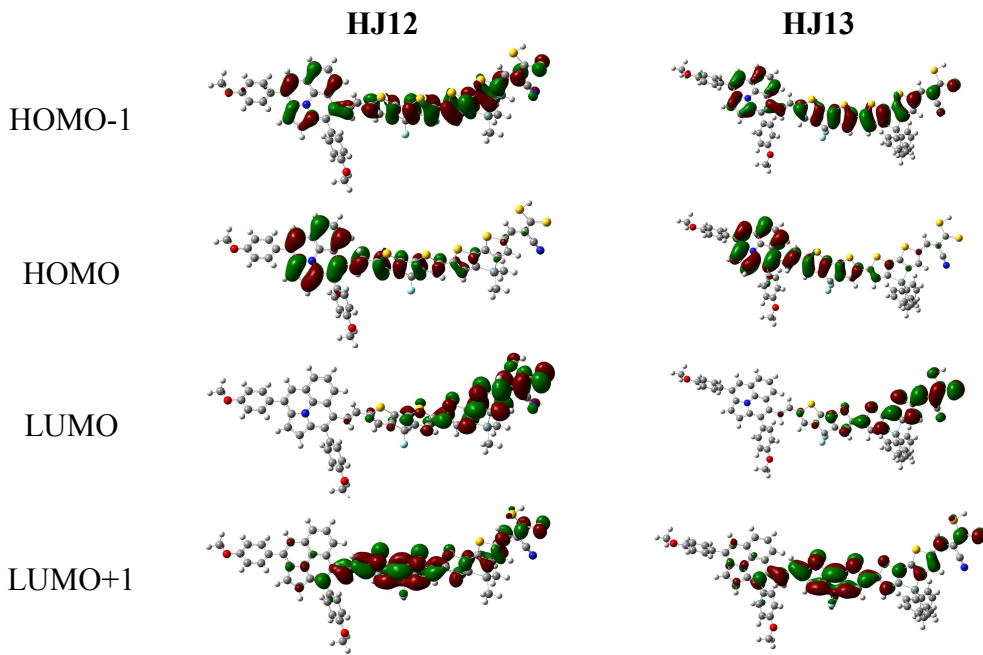

## S2. UV-Vis spectroscopy

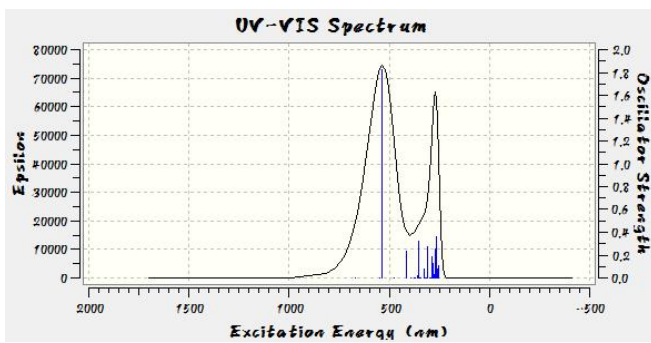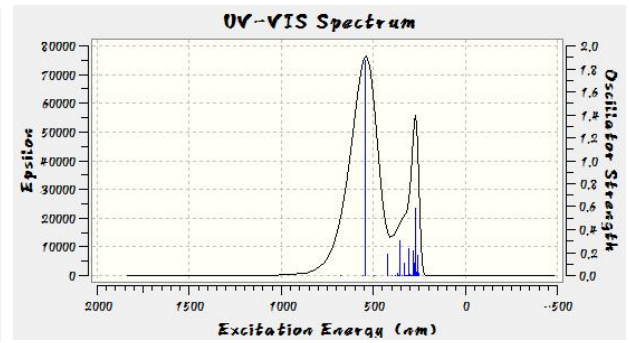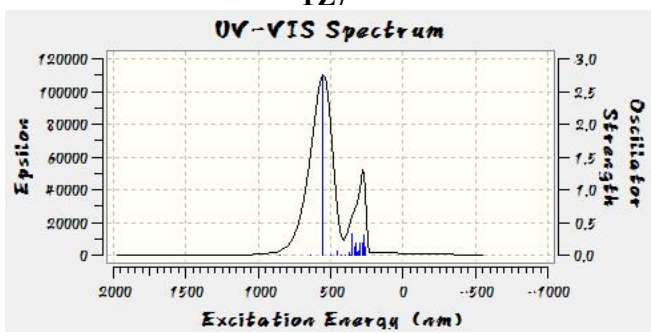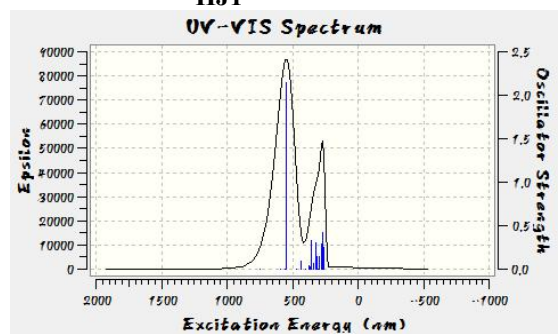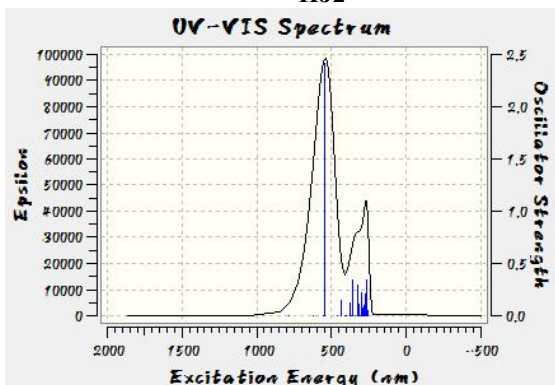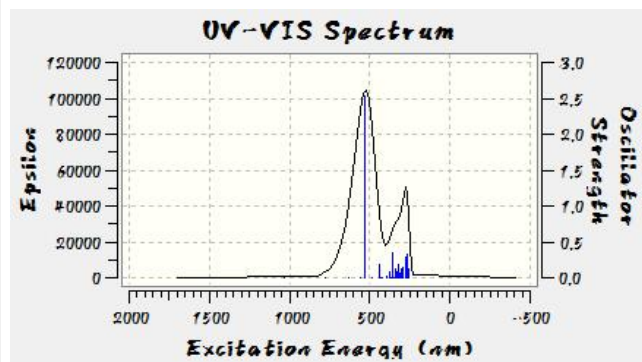

**HJ4**

**HJ5**



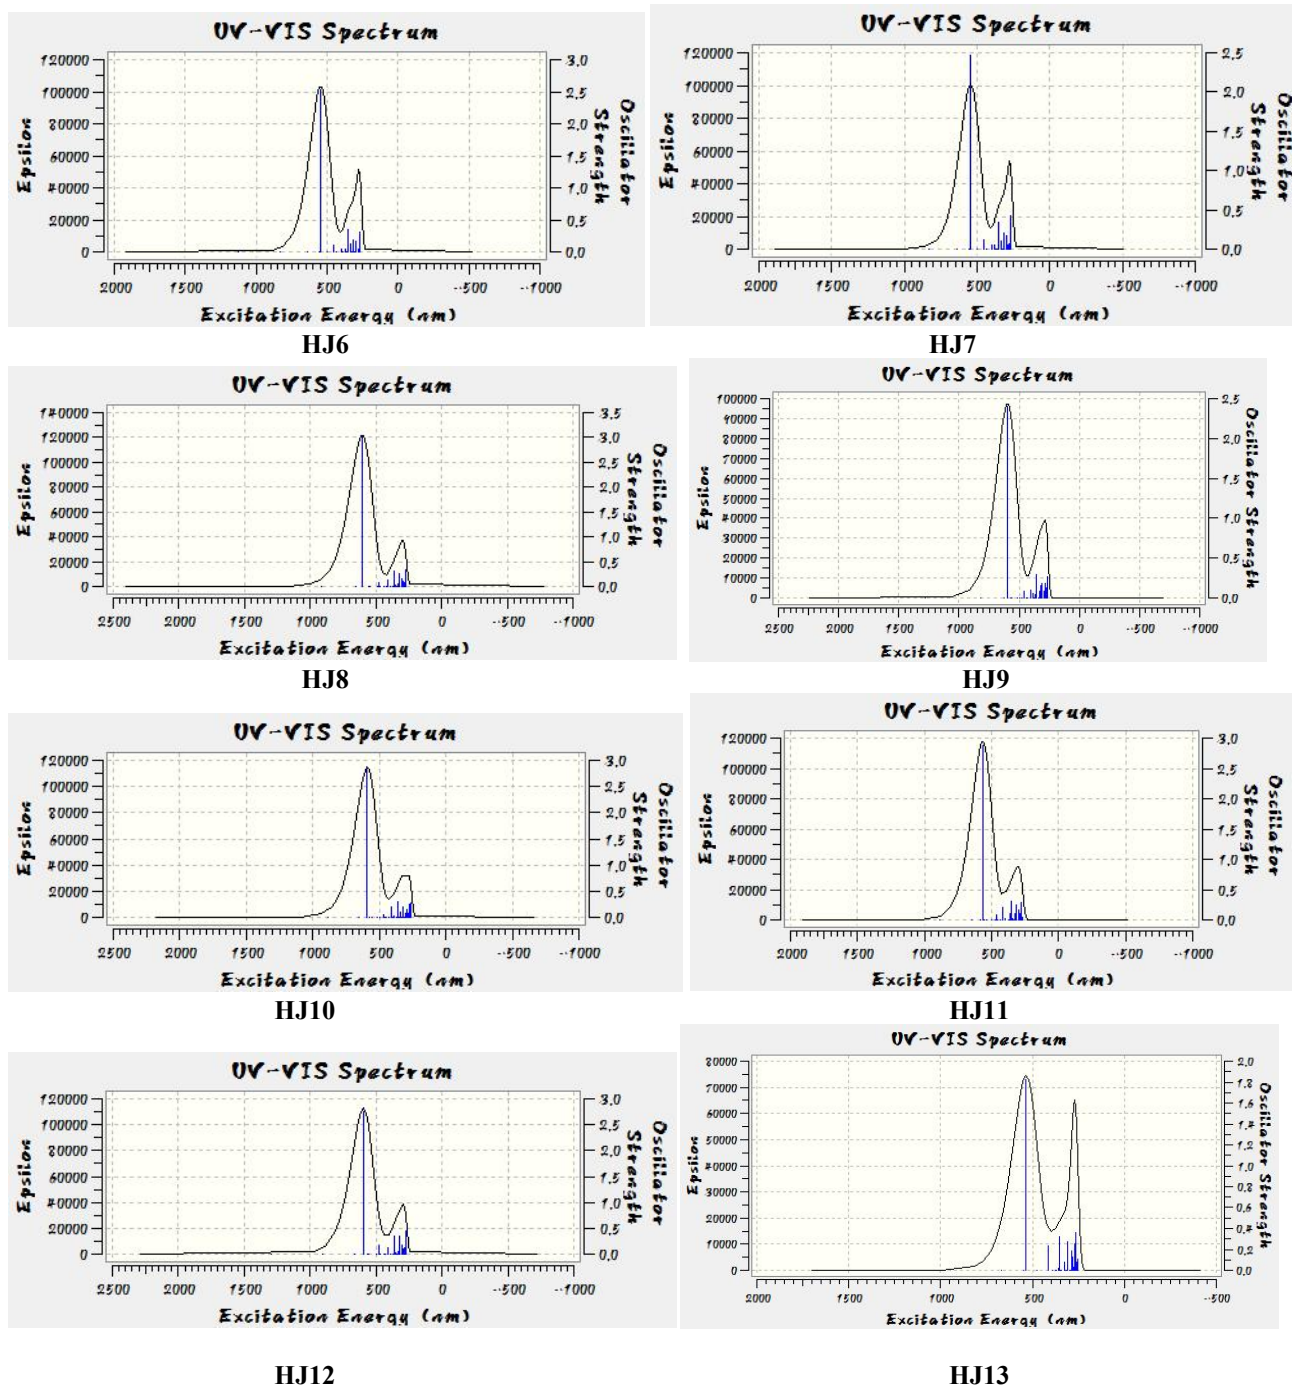

Figure S1. The TDDFT calculated UV-Vis spectroscopy of YZ7, HJ1~HJ3.

### S3. Fragmentation Scheme of TDM analysis

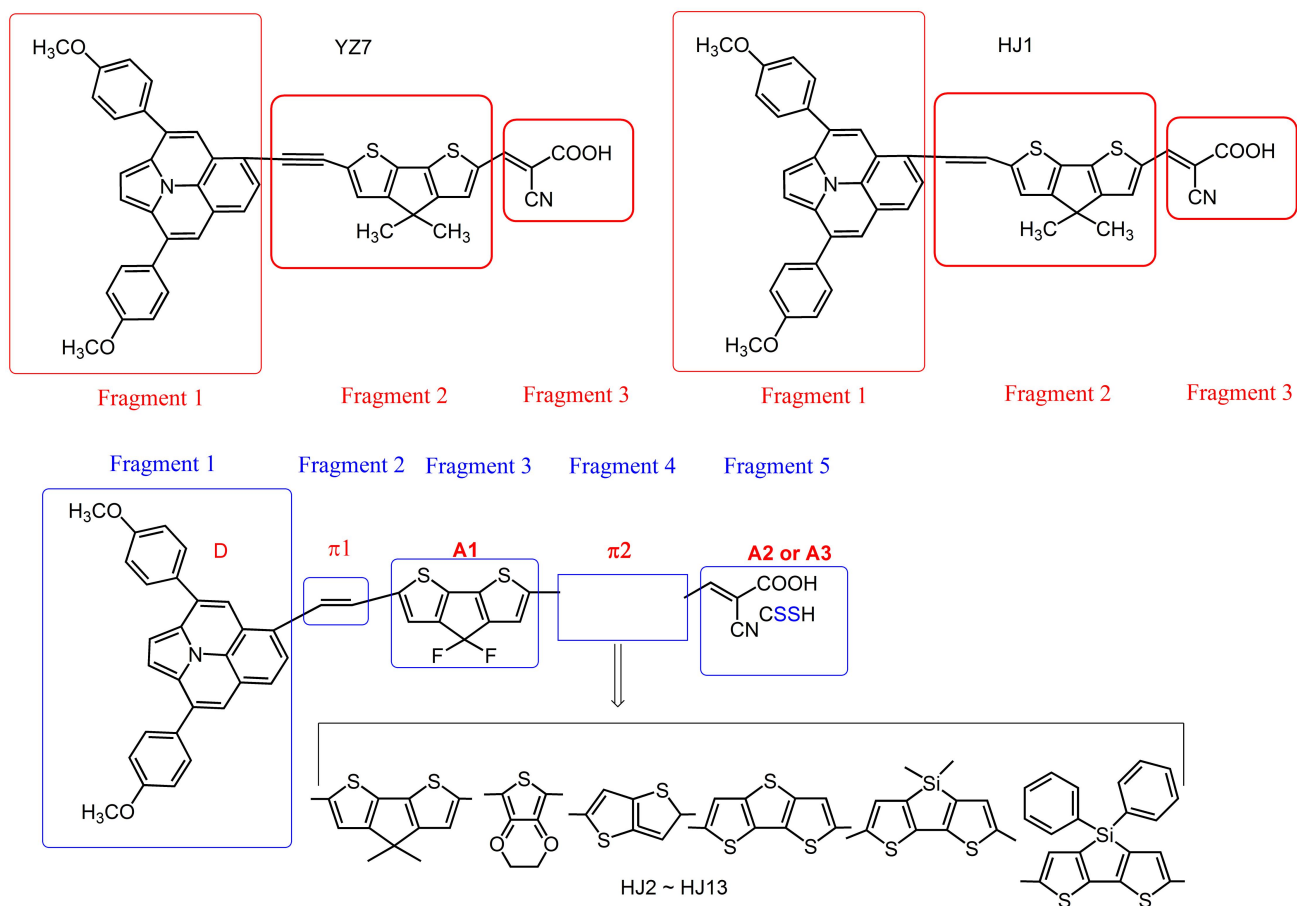

Figure S2. The fragmentation scheme of YZ7, HJ1~HJ3.

#### S4. Heat maps of fragment transition density matrix

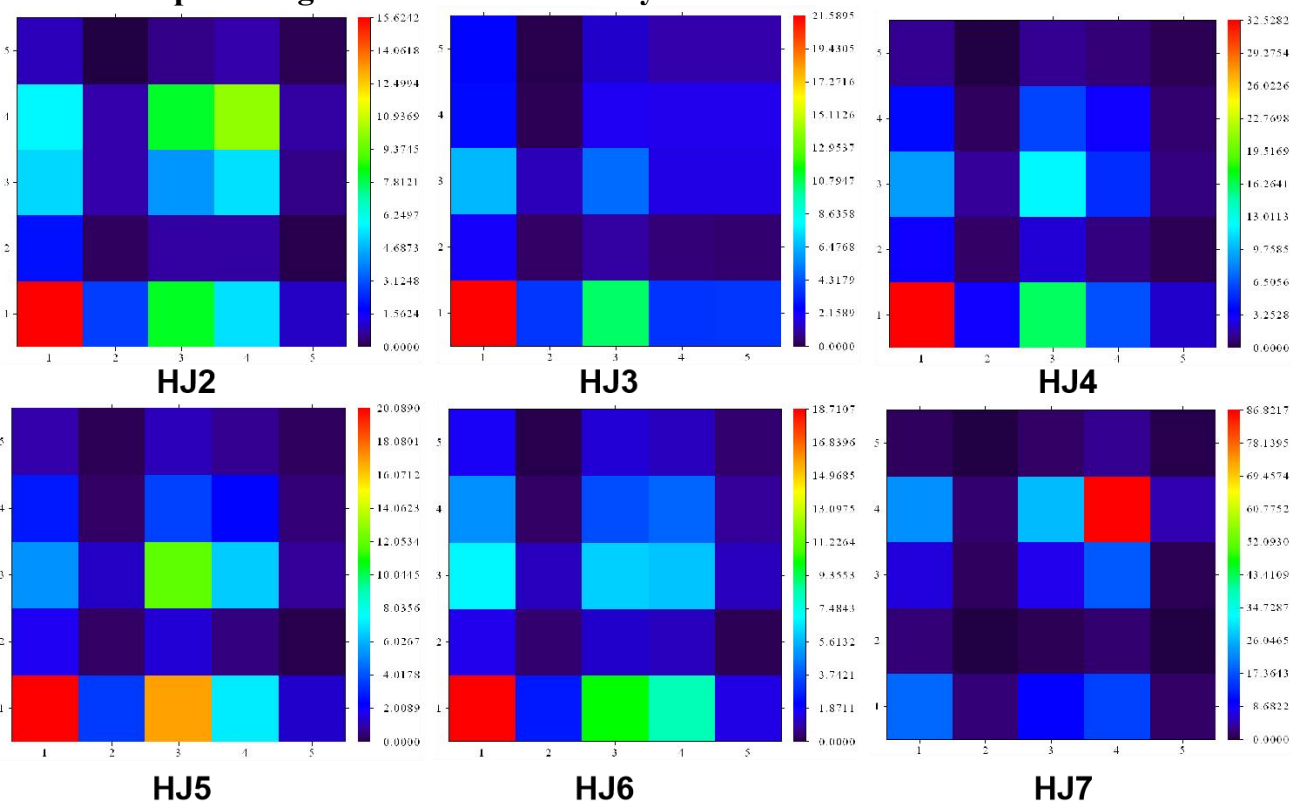

Figure S3. fragment transition density matrix heatmaps of HJ2~HJ7

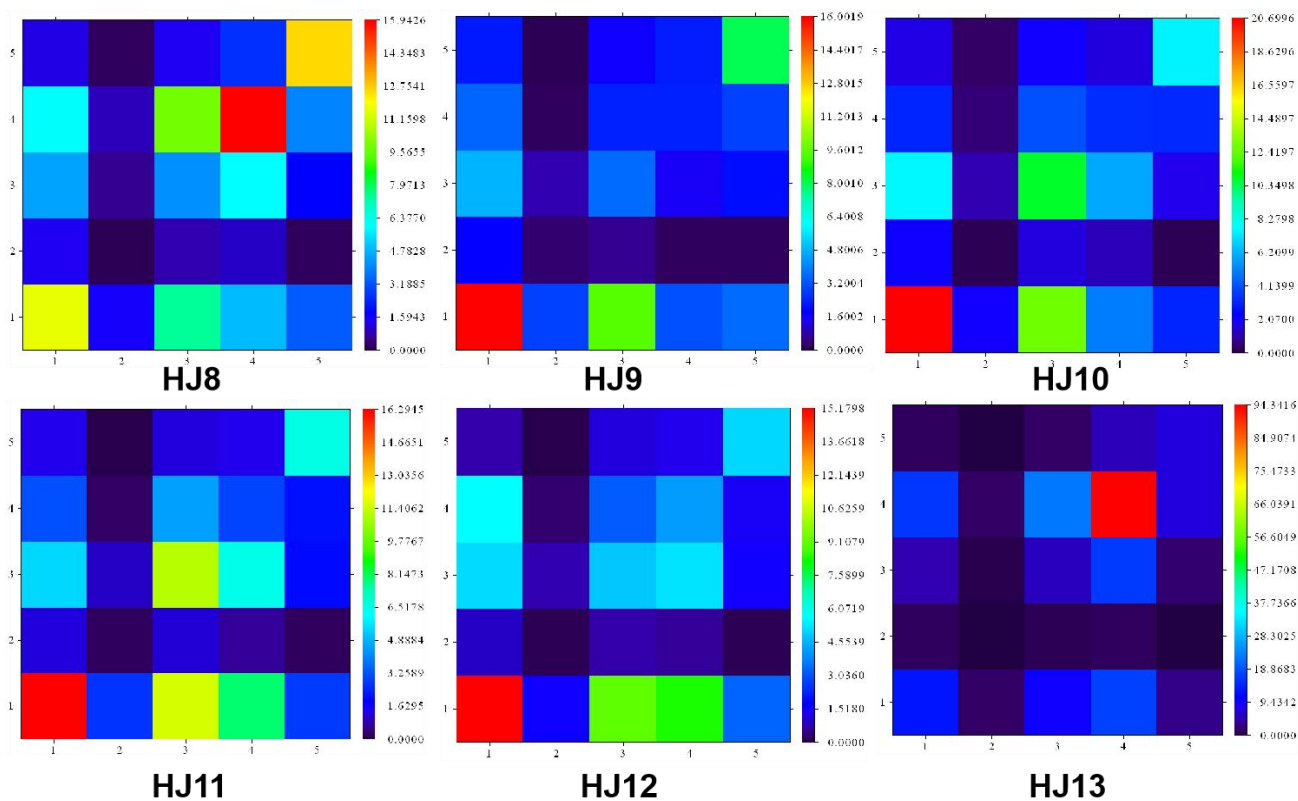

Figure S4. fragment transition density matrix heatmaps of HJ8~HJ13

### S5. DFT optimized cartesian coordinates

#### YZ7

|   |          |           |           |    |           |           |           |
|---|----------|-----------|-----------|----|-----------|-----------|-----------|
| 6 | 4.212050 | 1.043451  | 0.018834  | 6  | 10.481479 | -0.377893 | 1.058102  |
| 6 | 5.257597 | 1.974932  | 0.001839  | 6  | 11.233221 | -1.195323 | 0.208650  |
| 6 | 6.464904 | 1.275635  | 0.030302  | 6  | 10.577697 | -2.036314 | -0.689965 |
| 6 | 6.178569 | -0.095147 | 0.064284  | 6  | 9.187157  | -2.050597 | -0.728683 |
| 6 | 6.178569 | -0.095147 | 0.064284  | 8  | 0.484049  | 6.266130  | 0.007925  |
| 7 | 4.803039 | -0.208443 | 0.048651  | 8  | 12.577354 | -1.101641 | 0.328035  |
| 6 | 4.113665 | -1.384128 | -0.005015 | 6  | -0.407026 | 6.680367  | -1.012292 |
| 6 | 4.854438 | -2.585217 | -0.016084 | 6  | 13.379131 | -1.918353 | -0.506273 |
| 6 | 4.133421 | -3.786418 | -0.062414 | 6  | 0.643764  | -0.010755 | -0.023409 |
| 6 | 2.746358 | -3.767890 | -0.102113 | 6  | -0.571636 | -0.031957 | 0.011112  |
| 6 | 2.035699 | -2.571036 | -0.099283 | 6  | -1.966494 | -0.025917 | 0.037330  |
| 6 | 2.706837 | -1.344633 | -0.053597 | 6  | -2.815996 | 1.066070  | 0.156292  |
| 6 | 2.051507 | -0.043275 | -0.044050 | 6  | -4.164153 | 0.688517  | 0.141986  |
| 6 | 2.798454 | 1.128777  | -0.017200 | 6  | -4.340577 | -0.682172 | 0.012900  |
| 6 | 6.948022 | -1.299226 | 0.071864  | 16 | -2.855427 | -1.532926 | -0.091595 |
| 6 | 6.283529 | -2.496457 | 0.030918  | 6  | -5.495491 | 1.409863  | 0.233934  |
| 6 | 2.172777 | 2.466836  | -0.030098 | 6  | -6.444292 | 0.230500  | 0.130743  |
| 6 | 8.422421 | -1.240872 | 0.110975  | 6  | -5.735498 | -0.968366 | 0.004140  |
| 6 | 2.457082 | 3.401644  | 0.974055  | 6  | -7.819294 | 0.048409  | 0.130210  |
| 6 | 1.875017 | 4.655868  | 0.965488  | 6  | -8.182851 | -1.297893 | 0.002196  |
| 6 | 0.999339 | 5.017777  | -0.062645 | 16 | -6.755055 | -2.323789 | -0.115825 |
| 6 | 0.713398 | 4.103065  | -1.076281 | 6  | -5.646233 | 2.134240  | 1.578532  |
| 6 | 1.296169 | 2.840563  | -1.047328 | 6  | -5.684554 | 2.387720  | -0.933405 |
| 6 | 9.100152 | -0.399982 | 1.004767  | 6  | -9.441660 | -1.931936 | -0.045379 |

6 -10.703716 -1.392143 0.021780  
 6 -11.908212 -2.228649 -0.046826  
 8 -13.039346 -1.797369 0.006006  
 8 -11.638333 -3.537032 -0.175692  
 6 -10.947662 -0.004266 0.160480  
 7 -11.131913 1.132575 0.273902  
 1 5.133506 3.046573 -0.033038  
 1 7.455146 1.704346 0.017507  
 1 4.672255 -4.728241 -0.067937  
 1 2.201596 -4.705602 -0.138169  
 1 0.952057 -2.579702 -0.133167  
 1 6.851368 -3.421020 0.055225  
 1 3.129984 3.132956 1.781929  
 1 2.085327 5.373881 1.750818  
 1 0.047923 4.360192 -1.890764  
 1 1.071467 2.139822 -1.844511  
 1 8.535632 0.226974 1.686979  
 1 11.001523 0.264767 1.760362  
 1 11.132929 -2.673496 -1.367043  
 1 8.689782 -2.697222 -1.444844  
 1 -0.697268 7.699377 -0.761320  
 1 0.080452 6.673538 -1.992796  
 1 -1.299504 6.046425 -1.042289  
 1 14.411748 -1.690734 -0.246437  
 1 13.185546 -2.981004 -0.326050  
 1 13.212934 -1.689862 -1.564240  
 1 -2.439962 2.077082 0.249167  
 1 -8.548604 0.843051 0.217568  
 1 -6.638803 2.586484 1.655332  
 1 -4.900938 2.929841 1.665047  
 1 -5.513935 1.443053 2.414515  
 1 -6.676386 2.845627 -0.886834  
 1 -4.938044 3.185078 -0.881956  
 1 -5.582165 1.877954 -1.894567  
 1 -9.422907 -3.013162 -0.151187  
 1 -12.483686 -4.003680 -0.212862

**HJ1**

6 -4.058758 1.036189 -0.028506  
 6 -5.050823 1.976510 -0.329071  
 6 -6.280629 1.315233 -0.361391  
 6 -6.057253 -0.040570 -0.095944  
 7 -4.696524 -0.181767 0.103792  
 6 -4.059984 -1.345268 0.422923  
 6 -4.861378 -2.494859 0.602978  
 6 -4.219237 -3.680286 0.981912  
 6 -2.849010 -3.687409 1.191577  
 6 -2.077377 -2.546135 0.996757  
 6 -2.654518 -1.337765 0.577016  
 6 -1.934696 -0.084801 0.364240

6 -2.648466 1.079863 0.109026  
 6 -6.875860 -1.202870 0.037909  
 6 -6.273599 -2.381525 0.387601  
 6 -1.994740 2.395431 -0.085767  
 6 -8.332663 -1.119433 -0.184844  
 6 -1.072263 2.606979 -1.119000  
 6 -0.483427 3.843754 -1.308934  
 6 -0.797150 4.910146 -0.460942  
 6 -1.713969 4.718765 0.572574  
 6 -2.306415 3.471214 0.744266  
 6 -8.866721 -0.453498 -1.296915  
 6 -10.230826 -0.410813 -1.518019  
 6 -11.109854 -1.030091 -0.624403  
 6 -10.598404 -1.694721 0.489716  
 6 -9.223129 -1.732612 0.696289  
 8 -0.168079 6.079480 -0.717879  
 8 -12.426507 -0.931564 -0.919492  
 6 -0.458122 7.190033 0.112302  
 6 -13.353657 -1.548731 -0.044727  
 6 -0.486132 0.008524 0.446855  
 6 0.424427 -0.916525 0.067957  
 6 1.848642 -0.726403 0.156419  
 6 2.583882 0.270905 0.783316  
 6 3.963027 0.101789 0.616360  
 6 4.285837 -1.024408 -0.129866  
 16 2.892698 -1.887368 -0.633442  
 6 5.209636 0.845056 1.057837  
 6 6.279066 -0.035236 0.437653  
 6 5.699870 -1.112442 -0.244552  
 6 7.663025 -0.037488 0.377553  
 6 8.170102 -1.119821 -0.355634  
 16 6.857471 -2.130026 -0.963402  
 6 5.247188 2.266420 0.480710  
 6 5.327050 0.878423 2.587571  
 6 9.486329 -1.507600 -0.669235  
 6 10.685072 -0.920256 -0.332534  
 6 11.969227 -1.481700 -0.762629  
 8 13.049181 -1.003059 -0.489405  
 8 11.841329 -2.596013 -1.501665  
 6 10.778890 0.258298 0.445589  
 7 10.840028 1.222603 1.083050  
 1 -4.877326 3.027390 -0.503895  
 1 -7.244663 1.761592 -0.551563  
 1 -4.807067 -4.580976 1.125554  
 1 -2.362437 -4.600976 1.517400  
 1 -1.016649 -2.592695 1.200362  
 1 -6.875709 -3.279201 0.485274  
 1 -0.823439 1.790504 -1.789085  
 1 0.224001 4.006310 -2.114954  
 1 -1.973131 5.524972 1.247497



|   |            |           |           |    |            |           |           |
|---|------------|-----------|-----------|----|------------|-----------|-----------|
| 1 | -3.015583  | 3.334084  | 1.554536  | 6  | -13.803845 | -2.872086 | 0.370667  |
| 1 | -8.200667  | 0.015426  | -2.013543 | 6  | -12.448582 | -2.677274 | 0.617874  |
| 1 | -10.638682 | 0.094439  | -2.386953 | 8  | -4.651290  | 6.317006  | -1.201245 |
| 1 | -11.254444 | -2.175681 | 1.204574  | 8  | -15.666756 | -2.527500 | -1.152992 |
| 1 | -8.839587  | -2.238717 | 1.576737  | 6  | -5.145909  | 7.432378  | -0.481994 |
| 1 | 0.146980   | 8.012772  | -0.265203 | 6  | -16.524552 | -3.205307 | -0.252765 |
| 1 | -1.517062  | 7.462845  | 0.055108  | 6  | -4.084813  | 0.395506  | 0.498549  |
| 1 | -0.187030  | 6.989107  | 1.154086  | 6  | -3.019701  | -0.393810 | 0.239402  |
| 1 | -14.338755 | -1.355858 | -0.466664 | 6  | 6.141706   | 0.360857  | 0.257246  |
| 1 | -13.188437 | -2.629816 | 0.010956  | 6  | 7.089932   | 1.368705  | 0.341143  |
| 1 | -13.299300 | -1.117485 | 0.960392  | 6  | 8.396220   | 0.882481  | 0.198484  |
| 1 | 2.121573   | 1.073619  | 1.344314  | 6  | 8.443141   | -0.488532 | -0.000556 |
| 1 | 8.303020   | 0.703949  | 0.837848  | 16 | 6.883346   | -1.204194 | 0.004680  |
| 1 | 6.184356   | 2.760822  | 0.750734  | 6  | 9.787013   | 1.487832  | 0.189116  |
| 1 | 4.420650   | 2.859004  | 0.882682  | 6  | 10.618345  | 0.239815  | -0.043389 |
| 1 | 5.164554   | 2.251087  | -0.608876 | 6  | 9.799653   | -0.889921 | -0.150625 |
| 1 | 6.265239   | 1.354781  | 2.885174  | 6  | 11.966474  | -0.055295 | -0.174293 |
| 1 | 4.501642   | 1.453071  | 3.017093  | 6  | 12.201107  | -1.420537 | -0.383936 |
| 1 | 5.301880   | -0.130629 | 3.006383  | 16 | 10.683856  | -2.318306 | -0.411117 |
| 1 | 9.584685   | -2.408019 | -1.269544 | 6  | 9.951868   | 2.493819  | -0.957944 |
| 1 | 12.731844  | -2.889349 | -1.735176 | 6  | 10.120359  | 2.142592  | 1.536370  |
| 1 | -0.112793  | 0.968899  | 0.793719  | 6  | 13.391606  | -2.151356 | -0.570421 |
| 1 | 0.094441   | -1.845152 | -0.387785 | 6  | 14.697164  | -1.719995 | -0.592731 |

## HJ2

|   |            |           |           |   |            |           |           |
|---|------------|-----------|-----------|---|------------|-----------|-----------|
| 6 | -7.747830  | 0.796715  | -0.198863 | 8 | 16.979602  | -2.311206 | -0.837926 |
| 6 | -8.859066  | 1.540730  | -0.610386 | 8 | 15.424941  | -3.919358 | -0.974941 |
| 6 | -9.969722  | 0.692930  | -0.621668 | 6 | 15.069932  | -0.366189 | -0.412285 |
| 6 | -9.551355  | -0.583692 | -0.231474 | 7 | 15.359898  | 0.744225  | -0.262747 |
| 7 | -8.194536  | -0.491196 | 0.021063  | 1 | -8.842951  | 2.588132  | -0.870634 |
| 6 | -7.399867  | -1.509525 | 0.459724  | 1 | -10.982094 | 0.964349  | -0.878989 |
| 6 | -8.020457  | -2.753160 | 0.714264  | 1 | -7.666353  | -4.755938 | 1.414934  |
| 6 | -7.219438  | -3.788145 | 1.212296  | 1 | -5.266910  | -4.358649 | 1.879161  |
| 6 | -5.874728  | -3.562164 | 1.462335  | 1 | -4.236307  | -2.194832 | 1.432285  |
| 6 | -5.281750  | -2.332546 | 1.194250  | 1 | -9.882465  | -3.852556 | 0.606784  |
| 6 | -6.020594  | -1.267344 | 0.656094  | 1 | -4.581783  | 1.904645  | -1.906165 |
| 6 | -5.495297  | 0.062936  | 0.360335  | 1 | -3.873579  | 4.224033  | -2.390324 |
| 6 | -6.368006  | 1.073558  | -0.021024 | 1 | -6.443873  | 5.648652  | 0.740671  |
| 6 | -10.184651 | -1.845729 | -0.020047 | 1 | -7.150245  | 3.353038  | 1.203530  |
| 6 | -9.422853  | -2.882131 | 0.448552  | 1 | -11.593144 | -1.031948 | -2.211611 |
| 6 | -5.916860  | 2.455590  | -0.308495 | 1 | -13.997021 | -1.367361 | -2.658512 |
| 6 | -11.626353 | -2.011372 | -0.290716 | 1 | -14.407949 | -3.385330 | 1.108437  |
| 6 | -4.987619  | 2.724290  | -1.322157 | 1 | -12.028701 | -3.039368 | 1.551128  |
| 6 | -4.587921  | 4.018587  | -1.600347 | 1 | -4.657825  | 8.306212  | -0.910723 |
| 6 | -5.104377  | 5.088262  | -0.863017 | 1 | -6.230505  | 7.530126  | -0.596953 |
| 6 | -6.030722  | 4.840628  | 0.149829  | 1 | -4.894746  | 7.362577  | 0.581575  |
| 6 | -6.431391  | 3.533465  | 0.410486  | 1 | -17.509714 | -3.201642 | -0.716554 |
| 6 | -12.208931 | -1.535669 | -1.473897 | 1 | -16.200790 | -4.239960 | -0.097932 |
| 6 | -13.553153 | -1.725616 | -1.735838 | 1 | -16.576471 | -2.689305 | 0.711719  |
| 6 | -14.363787 | -2.394329 | -0.813664 | 1 | 6.823006   | 2.409111  | 0.478167  |
|   |            |           |           | 1 | 12.766050  | 0.672148  | -0.125083 |

|    |           |           |           |   |            |           |           |
|----|-----------|-----------|-----------|---|------------|-----------|-----------|
| 1  | 10.980379 | 2.863360  | -0.991533 | 6 | -12.259581 | -1.300940 | -1.706501 |
| 1  | 9.286998  | 3.349186  | -0.808995 | 6 | -13.120710 | -1.878839 | -0.768829 |
| 1  | 9.716247  | 2.034659  | -1.921158 | 6 | -12.604807 | -2.341440 | 0.441262  |
| 1  | 11.150158 | 2.510060  | 1.533948  | 6 | -11.242693 | -2.221882 | 0.698533  |
| 1  | 9.455987  | 2.992023  | 1.717950  | 8 | -2.892575  | 6.190247  | -1.403873 |
| 1  | 10.007336 | 1.431502  | 2.358382  | 8 | -14.425710 | -1.943826 | -1.119819 |
| 1  | 13.272396 | -3.220844 | -0.721053 | 6 | -3.319218  | 7.361694  | -0.731587 |
| 1  | 16.221643 | -4.449177 | -1.109986 | 6 | -15.334582 | -2.527662 | -0.203993 |
| 1  | -3.890290 | 1.425241  | 0.788159  | 6 | -2.699365  | 0.313734  | 0.530124  |
| 1  | -3.171267 | -1.394428 | -0.153857 | 6 | -1.686685  | -0.553689 | 0.311363  |
| 6  | -1.648469 | 0.023780  | 0.390034  | 6 | 10.791944  | -2.130159 | -0.776831 |
| 6  | -1.114625 | 1.176427  | 0.947747  | 6 | 12.128193  | -1.935296 | -1.030568 |
| 6  | 0.281791  | 1.184289  | 0.882101  | 6 | 13.004111  | -3.076023 | -1.346603 |
| 6  | 0.827785  | 0.061276  | 0.293922  | 6 | 12.768943  | -0.674772 | -1.137301 |
| 1  | -1.718848 | 1.959108  | 1.388044  | 7 | 13.324382  | 0.326946  | -1.296621 |
| 6  | 1.397504  | 2.112127  | 1.306077  | 1 | -7.302750  | 2.744457  | -0.954928 |
| 6  | 2.639397  | 1.366857  | 0.875094  | 1 | -9.538520  | 1.257101  | -0.920003 |
| 6  | 4.022302  | 1.562850  | 0.937531  | 1 | -6.602662  | -4.559437 | 1.635424  |
| 6  | 4.716095  | 0.499920  | 0.381993  | 1 | -4.186972  | -4.292671 | 2.106590  |
| 6  | 2.265619  | 0.174633  | 0.289848  | 1 | -3.020016  | -2.217279 | 1.581550  |
| 1  | 4.512139  | 2.419862  | 1.381362  | 1 | -8.752584  | -3.554747 | 0.766891  |
| 9  | 1.300836  | 3.341642  | 0.715625  | 1 | -3.093903  | 1.757286  | -1.932808 |
| 9  | 1.382527  | 2.357474  | 2.651302  | 1 | -2.242469  | 4.007181  | -2.505191 |
| 16 | -0.382389 | -1.034514 | -0.198574 | 1 | -4.727630  | 5.711948  | 0.553498  |
| 16 | 3.619854  | -0.730511 | -0.217518 | 1 | -5.575310  | 3.484497  | 1.104594  |

### HJ3

|   |            |           |           |   |            |           |           |
|---|------------|-----------|-----------|---|------------|-----------|-----------|
| 6 | -6.326197  | 0.917138  | -0.201621 | 1 | -10.254672 | -0.751767 | -2.183724 |
| 6 | -7.386036  | 1.711427  | -0.653377 | 1 | -12.669922 | -0.953953 | -2.648799 |
| 6 | -8.546906  | 0.934312  | -0.642026 | 1 | -13.248028 | -2.784950 | 1.191084  |
| 6 | -8.211535  | -0.349265 | -0.197407 | 1 | -10.856728 | -2.570749 | 1.651260  |
| 7 | -6.853922  | -0.330870 | 0.064877  | 1 | -2.777351  | 8.186076  | -1.192418 |
| 6 | -6.127650  | -1.377974 | 0.551530  | 1 | -4.395500  | 7.521237  | -0.855328 |
| 6 | -6.826584  | -2.569102 | 0.850136  | 1 | -3.075106  | 7.319119  | 0.335089  |
| 6 | -6.095136  | -3.630311 | 1.397729  | 1 | -16.312430 | -2.481361 | -0.680772 |
| 6 | -4.740832  | -3.478018 | 1.651485  | 1 | -15.078960 | -3.573219 | -0.002243 |
| 6 | -4.070193  | -2.299842 | 1.338792  | 1 | -15.364000 | -1.969332 | 0.737586  |
| 6 | -4.737253  | -1.214346 | 0.750202  | 1 | 10.464618  | -3.156668 | -0.921510 |
| 6 | -4.127557  | 0.066769  | 0.403776  | 1 | -2.438451  | 1.342138  | 0.767453  |
| 6 | -4.933162  | 1.114444  | -0.024001 | 1 | -1.900885  | -1.561013 | -0.032615 |
| 6 | -8.923990  | -1.560178 | 0.056792  | 6 | -0.292692  | -0.211888 | 0.437441  |
| 6 | -8.232175  | -2.621756 | 0.575095  | 6 | 0.310690   | 0.929523  | 0.947453  |
| 6 | -4.395627  | 2.452945  | -0.364138 | 6 | 1.703448   | 0.859788  | 0.861560  |
| 6 | -10.370426 | -1.646788 | -0.225230 | 6 | 2.178743   | -0.311166 | 0.304868  |
| 6 | -3.449360  | 2.622990  | -1.383411 | 1 | -0.244367  | 1.758284  | 1.367491  |
| 6 | -2.969848  | 3.878050  | -1.710991 | 6 | 2.874179   | 1.739835  | 1.238027  |
| 6 | -3.421080  | 5.006169  | -1.019383 | 6 | 4.067021   | 0.913356  | 0.816819  |
| 6 | -4.363441  | 4.856787  | -0.002058 | 6 | 5.456638   | 1.045003  | 0.833976  |
| 6 | -4.844558  | 3.588380  | 0.308721  | 6 | 6.081639   | -0.072964 | 0.294670  |
| 6 | -10.909007 | -1.184942 | -1.434482 | 6 | 3.618199   | -0.276886 | 0.278398  |
|   |            |           |           | 1 | 6.008118   | 1.893266  | 1.213704  |
|   |            |           |           | 9 | 2.834722   | 2.951126  | 0.606078  |

|    |           |           |           |   |            |           |           |
|----|-----------|-----------|-----------|---|------------|-----------|-----------|
| 9  | 2.891675  | 2.030736  | 2.573755  | 6 | -3.043242  | 7.275519  | 0.381206  |
| 16 | 0.904248  | -1.358345 | -0.128249 | 6 | -15.569584 | -2.573422 | -0.859686 |
| 16 | 4.907300  | -1.270522 | -0.225818 | 6 | -3.031289  | 0.338228  | 0.698163  |
| 6  | 9.802291  | 0.013874  | 0.228795  | 6 | -2.030602  | -0.558029 | 0.538053  |
| 6  | 8.521291  | 0.534101  | 0.508868  | 6 | 13.006395  | -1.541908 | -0.492896 |
| 6  | 9.516018  | 2.546084  | 1.057034  | 6 | 14.127004  | -0.774561 | -0.660923 |
| 6  | 10.716406 | 1.738656  | 1.478674  | 6 | 15.468849  | -1.371251 | -0.765455 |
| 6  | 9.775154  | -1.238949 | -0.382698 | 6 | 14.096591  | 0.640367  | -0.746916 |
| 6  | 7.484257  | -0.314123 | 0.151002  | 7 | 14.073405  | 1.794641  | -0.818005 |
| 1  | 9.649386  | 2.941014  | 0.044534  | 1 | -7.600525  | 2.843945  | -0.700098 |
| 1  | 10.584441 | 1.342140  | 2.490249  | 1 | -9.809940  | 1.327394  | -0.917768 |
| 8  | 12.375836 | -4.261136 | -1.288842 | 1 | -6.962933  | -4.580476 | 1.519795  |
| 1  | 13.020790 | -4.940336 | -1.526321 | 1 | -4.600393  | -4.295285 | 2.201416  |
| 8  | 14.177557 | -2.975956 | -1.629565 | 1 | -3.429796  | -2.187435 | 1.846937  |
| 16 | 8.112613  | -1.769887 | -0.543072 | 1 | -9.055499  | -3.569060 | 0.521427  |
| 8  | 8.334351  | 1.736751  | 1.090242  | 1 | -4.767466  | 2.420110  | -2.142550 |
| 8  | 10.926129 | 0.639961  | 0.579441  | 1 | -3.927698  | 4.722387  | -2.491149 |
| 1  | 9.343687  | 3.370142  | 1.748276  | 1 | -3.790313  | 5.302548  | 1.760865  |
| 1  | 11.624447 | 2.338888  | 1.438108  | 1 | -4.615397  | 3.021091  | 2.096586  |

#### HJ4

|   |            |           |           |    |            |           |           |
|---|------------|-----------|-----------|----|------------|-----------|-----------|
| 6 | -6.636809  | 0.971302  | -0.050295 | 1  | -10.398042 | -0.612225 | -2.371894 |
| 6 | -7.684783  | 1.788041  | -0.491271 | 1  | -12.772682 | -0.814225 | -3.012677 |
| 6 | -8.829549  | 0.997150  | -0.610156 | 1  | -13.578077 | -2.891148 | 0.657550  |
| 6 | -8.498321  | -0.313493 | -0.244314 | 1  | -11.227602 | -2.677060 | 1.292586  |
| 7 | -7.158387  | -0.299338 | 0.092985  | 1  | -2.696416  | 8.202389  | -0.073022 |
| 6 | -6.453867  | -1.355966 | 0.590166  | 1  | -3.930143  | 7.480353  | 0.990167  |
| 6 | -7.156105  | -2.565561 | 0.790225  | 1  | -2.250702  | 6.864076  | 1.015103  |
| 6 | -6.453138  | -3.636791 | 1.355672  | 1  | -16.513307 | -2.509694 | -1.399102 |
| 6 | -5.127458  | -3.474404 | 1.726190  | 1  | -15.310136 | -3.626201 | -0.706329 |
| 6 | -4.452239  | -2.277157 | 1.507576  | 1  | -15.672738 | -2.076235 | 0.110520  |
| 6 | -5.085193  | -1.182606 | 0.899230  | 1  | 13.183224  | -2.612853 | -0.446024 |
| 6 | -4.463025  | 0.111545  | 0.623307  | 1  | 16.372320  | -3.012601 | -0.760237 |
| 6 | -5.264432  | 1.174841  | 0.222569  | 1  | -2.748935  | 1.381063  | 0.807618  |
| 6 | -9.208009  | -1.544156 | -0.102562 | 1  | -2.256401  | -1.597896 | 0.326976  |
| 6 | -8.536617  | -2.622305 | 0.409734  | 6  | -0.632281  | -0.213142 | 0.560960  |
| 6 | -4.742942  | 2.550185  | 0.006290  | 6  | -0.002569  | 0.987558  | 0.859669  |
| 6 | -10.630626 | -1.631376 | -0.485819 | 6  | 1.386486   | 0.883669  | 0.751055  |
| 6 | -4.552071  | 3.051077  | -1.285908 | 6  | 1.834163   | -0.369233 | 0.382034  |
| 6 | -4.083006  | 4.337033  | -1.489127 | 1  | -0.536070  | 1.884483  | 1.146513  |
| 6 | -3.799772  | 5.163240  | -0.397739 | 6  | 2.575512   | 1.798346  | 0.941004  |
| 6 | -3.994420  | 4.682749  | 0.896661  | 6  | 3.747407   | 0.898334  | 0.624676  |
| 6 | -4.463844  | 3.385143  | 1.084870  | 6  | 5.139530   | 1.006267  | 0.589624  |
| 6 | -11.094142 | -1.100376 | -1.697841 | 6  | 5.736754   | -0.192024 | 0.231684  |
| 6 | -12.421112 | -1.215368 | -2.068148 | 6  | 3.272981   | -0.358988 | 0.305819  |
| 6 | -13.333810 | -1.862080 | -1.229383 | 1  | 5.702612   | 1.898414  | 0.831610  |
| 6 | -12.893141 | -2.393620 | -0.017755 | 9  | 2.525006   | 2.889810  | 0.119944  |
| 6 | -11.553682 | -2.273954 | 0.338903  | 9  | 2.639944   | 2.304387  | 2.209438  |
| 8 | -3.346805  | 6.404023  | -0.692914 | 16 | 0.537465   | -1.453191 | 0.157480  |
| 8 | -14.610645 | -1.920974 | -1.672406 | 16 | 4.539327   | -1.438744 | -0.061349 |
|   |            |           |           | 6  | 7.141592   | -0.455524 | 0.080630  |
|   |            |           |           | 6  | 8.143006   | 0.480669  | -0.086103 |

|            |            |           |           |    |            |           |           |
|------------|------------|-----------|-----------|----|------------|-----------|-----------|
| 6          | 9.405691   | -0.128917 | -0.176068 | 6  | 9.965942   | -0.634855 | -0.108430 |
| 6          | 9.378377   | -1.524918 | -0.093351 | 6  | 12.210186  | 0.043883  | -0.233545 |
| 6          | 11.644715  | -1.182427 | -0.367239 | 6  | 12.334994  | -1.334256 | -0.373150 |
| 6          | 10.632488  | -2.123253 | -0.200451 | 16 | 10.765876  | -2.134371 | -0.315513 |
| 1          | 7.958617   | 1.543579  | -0.161488 | 6  | 13.474345  | -2.157765 | -0.548924 |
| 1          | 10.830031  | -3.186993 | -0.161046 | 6  | 14.798189  | -1.817539 | -0.627440 |
| 16         | 7.759491   | -2.095521 | 0.130128  | 6  | 15.850148  | -2.830167 | -0.816764 |
| 16         | 11.009865  | 0.459955  | -0.392494 | 8  | 17.029876  | -2.571450 | -0.893037 |
| 8          | 16.484708  | -0.729533 | -0.909482 | 8  | 15.370805  | -4.078710 | -0.897887 |
| 8          | 15.457892  | -2.709021 | -0.684100 | 6  | 15.264808  | -0.482539 | -0.535511 |
| <b>HJ5</b> |            |           |           | 7  | 15.630259  | 0.612122  | -0.458601 |
| 6          | -7.574418  | 0.769703  | -0.210063 | 1  | -8.700791  | 2.524972  | -0.924152 |
| 6          | -8.696681  | 1.481667  | -0.647486 | 1  | -10.802405 | 0.852775  | -0.934230 |
| 6          | -9.787623  | 0.608654  | -0.659626 | 1  | -7.388645  | -4.753753 | 1.492990  |
| 6          | -9.345641  | -0.651879 | -0.243938 | 1  | -5.004697  | -4.294906 | 1.980128  |
| 7          | -7.994768  | -0.524523 | 0.024535  | 1  | -4.017128  | -2.115704 | 1.510194  |
| 6          | -7.183151  | -1.517627 | 0.489177  | 1  | -9.613805  | -3.914065 | 0.641630  |
| 6          | -7.778744  | -2.770902 | 0.755779  | 1  | -4.414920  | 1.920156  | -1.899164 |
| 6          | -6.961038  | -3.779390 | 1.280353  | 1  | -3.751372  | 4.246439  | -2.412666 |
| 6          | -5.624958  | -3.519083 | 1.543140  | 1  | -6.386417  | 5.664201  | 0.667208  |
| 6          | -5.056352  | -2.280824 | 1.262324  | 1  | -7.048475  | 3.361372  | 1.159034  |
| 6          | -5.812244  | -1.241292 | 0.698283  | 1  | -11.348100 | -1.177952 | -2.244508 |
| 6          | -5.313294  | 0.095513  | 0.387129  | 1  | -13.736604 | -1.577455 | -2.720351 |
| 6          | -6.203369  | 1.080326  | -0.020228 | 1  | -14.155259 | -3.545239 | 1.072141  |
| 6          | -9.952879  | -1.924744 | -0.021041 | 1  | -11.791328 | -3.136153 | 1.543180  |
| 6          | -9.174218  | -2.935965 | 0.474077  | 1  | -4.637204  | 8.333218  | -1.005290 |
| 6          | -5.779169  | 2.467191  | -0.324952 | 1  | -6.196826  | 7.529634  | -0.695784 |
| 6          | -11.386404 | -2.127903 | -0.308948 | 1  | -4.870336  | 7.407273  | 0.498662  |
| 6          | -4.844751  | 2.739910  | -1.332749 | 1  | -17.232136 | -3.467967 | -0.801652 |
| 6          | -4.469930  | 4.038005  | -1.627299 | 1  | -15.907141 | -4.463200 | -0.147367 |
| 6          | -5.017379  | 5.107726  | -0.912746 | 1  | -16.334178 | -2.910453 | 0.632303  |
| 6          | -5.949508  | 4.856102  | 0.093809  | 1  | 6.950958   | 2.704655  | 0.399130  |
| 6          | -6.324862  | 3.544835  | 0.371023  | 1  | 13.050749  | 0.723818  | -0.241836 |
| 6          | -11.962614 | -1.684573 | -1.507719 | 1  | 13.278089  | -3.222936 | -0.635918 |
| 6          | -13.297993 | -1.910494 | -1.785786 | 1  | 16.123165  | -4.672694 | -1.021429 |
| 6          | -14.106029 | -2.584013 | -0.864826 | 1  | -3.740021  | 1.497130  | 0.811180  |
| 6          | -13.552520 | -3.029479 | 0.335013  | 1  | -2.959417  | -1.319069 | -0.091585 |
| 6          | -12.205976 | -2.798739 | 0.598407  | 6  | -1.467252  | 0.133778  | 0.445718  |
| 8          | -4.586837  | 6.340456  | -1.265533 | 6  | -0.957754  | 1.294463  | 1.009264  |
| 8          | -15.400219 | -2.753971 | -1.220841 | 6  | 0.438373   | 1.332022  | 0.942669  |
| 6          | -5.111729  | 7.455997  | -0.568340 | 6  | 1.006790   | 0.224036  | 0.348005  |
| 6          | -16.254449 | -3.439575 | -0.323130 | 1  | -1.578263  | 2.061263  | 1.454750  |
| 6          | -3.911368  | 0.460031  | 0.533262  | 6  | 1.534972   | 2.280487  | 1.371633  |
| 6          | -2.829422  | -0.311368 | 0.291247  | 6  | 2.791721   | 1.563752  | 0.935065  |
| 6          | 6.311874   | 0.633055  | 0.295650  | 6  | 4.170886   | 1.788047  | 0.995211  |
| 6          | 7.229015   | 1.662581  | 0.316932  | 6  | 4.883115   | 0.743973  | 0.430323  |
| 6          | 8.546511   | 1.186315  | 0.184272  | 6  | 2.442263   | 0.367334  | 0.343474  |
| 6          | 8.638018   | -0.197867 | 0.047712  | 1  | 4.645295   | 2.650764  | 1.444878  |
| 16         | 7.078401   | -0.932544 | 0.114476  | 9  | 1.412473   | 3.511036  | 0.788661  |
| 6          | 10.878812  | 0.431154  | -0.085254 | 9  | 1.515876   | 2.516974  | 2.718194  |

16 -0.180043 -0.894818 -0.148885  
16 3.812698 -0.505540 -0.174159  
16 10.097517 1.978007 0.125164

**HJ6**

6 -7.891143 0.729090 -0.250118  
6 -9.015445 1.415672 -0.721443  
6 -10.100867 0.535750 -0.704311  
6 -9.653251 -0.704222 -0.236318  
7 -8.304609 -0.557443 0.033754  
6 -7.489257 -1.526071 0.541554  
6 -8.078322 -2.771638 0.854776  
6 -7.256938 -3.753134 1.422979  
6 -5.923819 -3.473962 1.681690  
6 -5.361598 -2.244171 1.354737  
6 -6.121247 -1.232736 0.746352  
6 -5.629060 0.093882 0.385043  
6 -6.522963 1.055840 -0.065756  
6 -10.253659 -1.971103 0.034193  
6 -9.471304 -2.956816 0.572997  
6 -6.105626 2.432059 -0.423619  
6 -11.684472 -2.194375 -0.252319  
6 -5.166867 2.669851 -1.436236  
6 -4.798891 3.957376 -1.781449  
6 -5.357902 5.051614 -1.114573  
6 -6.294191 4.834917 -0.103801  
6 -6.662376 3.533482 0.224738  
6 -12.257206 -1.802146 -1.470402  
6 -13.590017 -2.046140 -1.745458  
6 -14.398966 -2.686897 -0.802200  
6 -13.848826 -3.081860 0.416727  
6 -12.504794 -2.833485 0.676998  
8 -4.933825 6.271924 -1.515353  
8 -15.690644 -2.877328 -1.157015  
6 -5.472291 7.411311 -0.868959  
6 -16.546237 -3.529416 -0.235950  
6 -4.230024 0.472607 0.524671  
6 -3.142556 -0.300616 0.315576  
6 5.996087 0.701512 0.336521  
6 6.920356 1.730684 0.411995  
6 8.252537 1.304293 0.270373  
6 8.334358 -0.069918 0.076751  
16 6.788034 -0.831632 0.090902  
6 10.714136 0.290270 -0.052834  
6 9.648096 -0.620514 -0.099748  
6 11.940943 -0.344292 -0.234335  
6 11.842893 -1.726359 -0.420642  
16 10.161099 -2.227684 -0.363150  
6 10.294682 3.181424 -1.198116  
6 10.522311 2.762504 1.871637

6 12.821074 -2.722061 -0.637781  
6 14.186527 -2.609024 -0.723926  
6 15.047464 -3.775504 -0.962077  
8 16.254621 -3.721521 -1.047515  
8 14.363542 -4.923730 -1.078793  
6 14.875138 -1.378015 -0.594569  
7 15.427239 -0.366874 -0.487095  
1 -9.024728 2.447035 -1.039616  
1 -11.115645 0.762075 -0.993783  
1 -7.679425 -4.721093 1.672008  
1 -5.300924 -4.227856 2.152051  
1 -4.324642 -2.062413 1.600613  
1 -9.905667 -3.930276 0.777196  
1 -4.728250 1.830647 -1.966250  
1 -4.077059 4.138451 -2.570595  
1 -6.740019 5.662747 0.433440  
1 -7.389521 3.377443 1.015408  
1 -11.641800 -1.321706 -2.223788  
1 -14.025888 -1.752663 -2.694457  
1 -14.452320 -3.571678 1.170761  
1 -12.092911 -3.131044 1.636264  
1 -5.001254 8.273332 -1.338711  
1 -6.556960 7.470899 -1.007060  
1 -5.238496 7.408929 0.200844  
1 -17.521585 -3.581350 -0.717271  
1 -16.195692 -4.543573 -0.017115  
1 -16.632474 -2.962144 0.696761  
1 6.619991 2.762813 0.546219  
1 12.893213 0.170073 -0.235743  
1 11.355857 3.438053 -1.272262  
1 9.731306 4.109187 -1.058747  
1 9.982604 2.725909 -2.141319  
1 11.587219 3.013869 1.855924  
1 9.960833 3.680897 2.068804  
1 10.343892 2.064972 2.693924  
1 12.448439 -3.735630 -0.756994  
1 15.006019 -5.628697 -1.234106  
1 -4.066207 1.520111 0.765829  
1 -3.265333 -1.322002 -0.032001  
6 -1.783583 0.156861 0.461785  
6 -1.283020 1.335555 0.994871  
6 0.113138 1.380071 0.932294  
6 0.690806 0.259757 0.370174  
1 -1.909967 2.110005 1.417552  
6 1.202781 2.345180 1.340816  
6 2.465480 1.623687 0.930143  
6 3.842858 1.857652 0.992145  
6 4.566143 0.803054 0.459526  
6 2.125387 0.410613 0.368244  
1 4.308380 2.736740 1.418625



9 1.077017 3.559385 0.724502  
9 1.175708 2.618093 2.680598  
16 -0.487516 -0.879470 -0.100080  
16 3.505011 -0.468044 -0.116535  
14 10.004401 2.020200 0.236864

### HJ7

6 -9.104519 0.783509 -0.222497  
6 -10.197476 1.529889 -0.676372  
6 -11.324965 0.704566 -0.658486  
6 -10.935347 -0.560981 -0.207465  
7 -9.578801 -0.484008 0.051788  
6 -8.808202 -1.497220 0.542143  
6 -9.455578 -2.715331 0.848094  
6 -8.678983 -3.742233 1.398759  
6 -7.331557 -3.532065 1.648345  
6 -6.711916 -2.328210 1.328859  
6 -7.425626 -1.274183 0.737398  
6 -6.871317 0.030176 0.385124  
6 -7.720230 1.040216 -0.047167  
6 -11.595486 -1.799411 0.055536  
6 -10.858405 -2.828323 0.577115  
6 -7.238436 2.398193 -0.393198  
6 -13.037928 -1.949030 -0.220617  
6 -6.293734 2.601472 -1.407827  
6 -5.865364 3.873439 -1.740997  
6 -6.367954 4.986046 -1.059801  
6 -7.309434 4.803756 -0.047058  
6 -7.738615 3.518183 0.269405  
6 -13.600420 -1.518035 -1.430349  
6 -14.945626 -1.694544 -1.696608  
6 -15.777388 -2.304035 -0.752464  
6 -15.237688 -2.736081 0.458506  
6 -13.881178 -2.555766 0.709860  
8 -5.887245 6.188836 -1.449348  
8 -17.079485 -2.428619 -1.098395  
6 -6.367933 7.345681 -0.788490  
6 -17.958372 -3.047653 -0.176441  
6 -5.453913 0.336811 0.516220  
6 -4.408966 -0.488026 0.288519  
6 4.767358 0.020370 0.253389  
6 5.752522 0.992347 0.311371  
6 7.053466 0.481830 0.159145  
6 7.050930 -0.896173 -0.021758  
16 5.462665 -1.560308 0.015560  
6 9.448388 -0.686098 -0.161905  
6 8.327953 -1.528010 -0.202778  
6 10.634388 -1.392514 -0.350684  
6 10.449555 -2.765362 -0.533233  
16 8.740482 -3.162409 -0.467481

6 11.363134 -3.821661 -0.752226  
6 12.731995 -3.795510 -0.838454  
6 13.516180 -5.015899 -1.076949  
8 14.724161 -5.040331 -1.159368  
8 12.758812 -6.116310 -1.196850  
6 13.497910 -2.610964 -0.706601  
7 14.112946 -1.637347 -0.596059  
1 -10.158471 2.563864 -0.983609  
1 -12.329732 0.983970 -0.936287  
1 -9.146603 -4.690734 1.641826  
1 -6.742867 -4.320758 2.105493  
1 -5.665277 -2.200368 1.567502  
1 -11.338726 -3.781259 0.775160  
1 -5.898660 1.747961 -1.949114  
1 -5.139091 4.027993 -2.531683  
1 -7.712551 5.646327 0.500867  
1 -8.469011 3.388849 1.061870  
1 -12.968259 -1.061113 -2.184509  
1 -15.374085 -1.371501 -2.639359  
1 -15.858429 -3.202452 1.213381  
1 -13.476908 -2.881768 1.663093  
1 -5.858261 8.189184 -1.251473  
1 -7.449102 7.458412 -0.920762  
1 -6.129983 7.320868 0.280128  
1 -18.938855 -3.047590 -0.650061  
1 -17.655676 -4.079718 0.029814  
1 -18.009707 -2.486227 0.762349  
1 5.519018 2.042291 0.439656  
1 11.615455 -0.935582 -0.358984  
1 10.926643 -4.809395 -0.871699  
1 13.353837 -6.861939 -1.351321  
1 -5.235254 1.371677 0.768098  
1 -4.586772 -1.497716 -0.069605  
6 -3.027141 -0.102495 0.428006  
6 -2.461775 1.045058 0.964626  
6 -1.065519 1.015912 0.893708  
6 -0.551775 -0.130200 0.321790  
1 -3.044488 1.849117 1.395352  
6 0.076747 1.919390 1.300498  
6 1.296973 1.134231 0.877432  
6 2.685716 1.293122 0.930737  
6 3.346605 0.204081 0.386784  
6 0.888455 -0.055491 0.311121  
1 3.201111 2.142719 1.359658  
9 0.011696 3.141924 0.691405  
9 0.072156 2.185582 2.641759  
16 -1.791264 -1.202622 -0.147560  
16 2.214512 -1.004324 -0.188853  
14 8.844111 1.083302 0.108462  
6 9.163432 2.227416 -1.339378

|   |           |           |           |    |            |           |           |
|---|-----------|-----------|-----------|----|------------|-----------|-----------|
| 6 | 10.359338 | 2.953119  | -1.425082 | 8  | 5.298540   | 6.299679  | 1.293474  |
| 6 | 8.238850  | 2.342163  | -2.385386 | 8  | 16.118988  | -2.780601 | 1.199676  |
| 6 | 10.623639 | 3.765208  | -2.522435 | 6  | 5.817251   | 7.416798  | 0.594097  |
| 1 | 11.093772 | 2.888894  | -0.626708 | 6  | 16.972653  | -3.462087 | 0.298262  |
| 6 | 8.500139  | 3.156072  | -3.482711 | 6  | 4.622348   | 0.422491  | -0.515334 |
| 1 | 7.302516  | 1.792637  | -2.342829 | 6  | 3.540200   | -0.352444 | -0.283179 |
| 6 | 9.693446  | 3.867718  | -3.552415 | 6  | -5.599396  | 0.585123  | -0.300398 |
| 1 | 11.555200 | 4.319755  | -2.573164 | 6  | -6.527238  | 1.615730  | -0.369720 |
| 1 | 7.771220  | 3.236076  | -4.282905 | 6  | -7.841388  | 1.154943  | -0.241194 |
| 1 | 9.898080  | 4.503527  | -4.407902 | 6  | -7.918038  | -0.221182 | -0.068437 |
| 6 | 9.455425  | 1.810073  | 1.722482  | 16 | -6.372519  | -0.968987 | -0.080331 |
| 6 | 9.340805  | 3.183838  | 1.974421  | 6  | -9.218495  | 1.789823  | -0.226696 |
| 6 | 9.991512  | 0.992131  | 2.725367  | 6  | -10.076899 | 0.555042  | -0.025208 |
| 6 | 9.745294  | 3.722294  | 3.191094  | 6  | -9.278466  | -0.596704 | 0.064647  |
| 1 | 8.936656  | 3.844764  | 1.212360  | 6  | -11.426902 | 0.287895  | 0.090455  |
| 6 | 10.398741 | 1.528848  | 3.942098  | 6  | -11.694791 | -1.081550 | 0.271602  |
| 1 | 10.097228 | -0.075545 | 2.554345  | 16 | -10.191387 | -2.011571 | 0.290217  |
| 6 | 10.275111 | 2.894659  | 4.176292  | 6  | -9.368365  | 2.773825  | 0.941481  |
| 1 | 9.650419  | 4.788699  | 3.369304  | 6  | -9.529779  | 2.480544  | -1.561181 |
| 1 | 10.816102 | 0.881219  | 4.706508  | 6  | -12.888967 | -1.796231 | 0.435038  |
| 1 | 10.594572 | 3.314673  | 5.124719  | 6  | -14.205686 | -1.358793 | 0.460041  |

### HJ8

|   |           |           |           |   |            |           |           |
|---|-----------|-----------|-----------|---|------------|-----------|-----------|
| 6 | 8.286409  | 0.734239  | 0.215919  | 6 | -14.511384 | 0.019895  | 0.296109  |
| 6 | 9.408794  | 1.446405  | 0.653147  | 7 | -14.696572 | 1.153576  | 0.157787  |
| 6 | 10.500763 | 0.574935  | 0.660086  | 1 | 9.412055   | 2.488826  | 0.933131  |
| 6 | 10.059475 | -0.685002 | 0.241301  | 1 | 11.515835  | 0.819482  | 0.933201  |
| 7 | 8.708014  | -0.558693 | -0.023764 | 1 | 8.105577   | -4.782614 | -1.508552 |
| 6 | 7.896833  | -1.551049 | -0.490712 | 1 | 5.720666   | -4.324521 | -1.991703 |
| 6 | 8.493868  | -2.802293 | -0.763529 | 1 | 4.731007   | -2.148971 | -1.511982 |
| 6 | 7.676900  | -3.809763 | -1.291250 | 1 | 10.330634  | -3.943304 | -0.657065 |
| 6 | 6.340340  | -3.549980 | -1.551640 | 1 | 5.136786   | 1.878318  | 1.922619  |
| 6 | 5.770376  | -2.313685 | -1.264683 | 1 | 4.473198   | 4.203013  | 2.443214  |
| 6 | 6.525164  | -1.275800 | -0.696259 | 1 | 7.087821   | 5.628506  | -0.650519 |
| 6 | 6.024566  | 0.058802  | -0.377636 | 1 | 7.750041   | 3.327265  | -1.149380 |
| 6 | 6.914860  | 1.043702  | 0.030612  | 1 | 12.066355  | -1.214369 | 2.235937  |
| 6 | 10.668212 | -1.956081 | 0.012690  | 1 | 14.456317  | -1.611517 | 2.706027  |
| 6 | 9.889987  | -2.966496 | -0.484851 | 1 | 14.871013  | -3.566690 | -1.093433 |
| 6 | 6.490588  | 2.429393  | 0.340737  | 1 | 12.505617  | -3.159870 | -1.558810 |
| 6 | 12.102531 | -2.158107 | 0.297273  | 1 | 5.343699   | 8.292767  | 1.034590  |
| 6 | 5.562002  | 2.699419  | 1.354631  | 1 | 6.902935   | 7.492333  | 0.715181  |
| 6 | 5.187240  | 3.996635  | 1.653211  | 1 | 5.569617   | 7.368480  | -0.471492 |
| 6 | 5.728824  | 5.068042  | 0.936699  | 1 | 17.951275  | -3.490313 | 0.774870  |
| 6 | 6.655376  | 4.819061  | -0.075649 | 1 | 16.626681  | -4.485738 | 0.120059  |
| 6 | 7.030856  | 3.508712  | -0.356863 | 1 | 17.049709  | -2.929928 | -0.655697 |
| 6 | 12.680271 | -1.717657 | 1.496368  | 1 | -6.238323  | 2.652561  | -0.486755 |
| 6 | 14.016515 | -1.942323 | 1.771237  | 1 | -12.210271 | 1.032459  | 0.050509  |
| 6 | 14.823892 | -2.611613 | 0.846626  | 1 | -10.388579 | 3.165290  | 0.976364  |
| 6 | 14.268832 | -3.054214 | -0.353568 | 1 | -8.683679  | 3.616894  | 0.814806  |
| 6 | 12.921450 | -2.824786 | -0.613730 | 1 | -9.149397  | 2.288943  | 1.895931  |
|   |           |           |           | 1 | -10.551477 | 2.869625  | -1.555655 |

1 -8.846507 3.319457 -1.719756  
 1 -9.427044 1.785665 -2.398211  
 1 -12.756822 -2.868671 0.561766  
 1 -16.214951 -4.342208 0.978487  
 1 4.449856 1.463448 -0.777273  
 1 3.669766 -1.366916 0.081017  
 6 2.178715 0.097518 -0.423915  
 6 1.670140 1.283975 -0.933608  
 6 0.274405 1.315823 -0.874030  
 6 -0.296349 0.178614 -0.337602  
 1 2.291576 2.074049 -1.334882  
 6 -0.820496 2.284201 -1.260233  
 6 -2.078653 1.545482 -0.866628  
 6 -3.455545 1.772783 -0.920307  
 6 -4.172766 0.699343 -0.413851  
 6 -1.730488 0.319726 -0.334289  
 1 -3.926512 2.659511 -1.324418  
 9 -0.701683 3.483528 -0.615159  
 9 -0.795290 2.587992 -2.592918  
 16 0.890047 -0.961018 0.111998  
 16 -3.103031 -0.579836 0.129545  
 16 -16.900194 -1.715812 0.660757  
 16 -14.932693 -3.951604 0.866424

**HJ9**

6 -6.810744 0.869431 -0.246644  
 6 -7.886428 1.631525 -0.715587  
 6 -9.028732 0.829595 -0.694460  
 6 -8.666578 -0.438712 -0.227860  
 7 -7.311283 -0.385575 0.038853  
 6 -6.563742 -1.407600 0.545310  
 6 -7.236680 -2.609003 0.860646  
 6 -6.483752 -3.644314 1.427561  
 6 -5.135238 -3.457135 1.684723  
 6 -4.490593 -2.269283 1.356624  
 6 -5.178616 -1.209267 0.746957  
 6 -4.596388 0.079431 0.382241  
 6 -5.423677 1.101597 -0.066339  
 6 -9.353347 -1.660643 0.044691  
 6 -8.639131 -2.697466 0.581853  
 6 -4.914836 2.446107 -0.424381  
 6 -10.796144 -1.785819 -0.239982  
 6 -3.955290 2.620621 -1.430600  
 6 -3.502829 3.880514 -1.773947  
 6 -3.994985 5.011056 -1.114188  
 6 -4.950807 4.856088 -0.109862  
 6 -5.404055 3.582785 0.218338  
 6 -11.344753 -1.343551 -1.452177  
 6 -12.690822 -1.495850 -1.724745  
 6 -13.539092 -2.092864 -0.786892

6 -13.011848 -2.537073 0.425585  
 6 -11.654706 -2.380738 0.684261  
 8 -3.490604 6.197475 -1.515558  
 8 -14.838750 -2.192246 -1.141426  
 6 -3.962317 7.371612 -0.879856  
 6 -15.734381 -2.795300 -0.225648  
 6 -3.176084 0.361596 0.515191  
 6 -2.141276 -0.484913 0.317860  
 6 10.379410 -1.742767 -0.613081  
 6 11.704856 -1.453236 -0.902273  
 6 12.687841 -2.492818 -1.121950  
 6 12.131121 -0.118211 -1.146259  
 7 12.447572 0.963750 -1.400687  
 1 -7.824601 2.660368 -1.035194  
 1 -10.026562 1.125393 -0.979229  
 1 -6.971386 -4.580607 1.677373  
 1 -4.565060 -4.251251 2.155166  
 1 -3.444515 -2.157435 1.604544  
 1 -9.138705 -3.638577 0.787445  
 1 -3.569050 1.754083 -1.956904  
 1 -2.765878 4.016403 -2.557691  
 1 -5.346286 5.712190 0.422067  
 1 -6.144742 3.475038 1.004121  
 1 -10.701135 -0.896655 -2.202302  
 1 -13.111596 -1.164575 -2.667736  
 1 -13.644286 -2.994725 1.175865  
 1 -11.261137 -2.714502 1.639046  
 1 -3.434837 8.199263 -1.350931  
 1 -5.040157 7.499005 -1.026443  
 1 -3.737789 7.362911 0.192072  
 1 -16.711500 -2.775336 -0.705324  
 1 -15.454354 -3.833700 -0.018391  
 1 -15.781561 -2.235138 0.714313  
 1 10.096449 -2.785695 -0.746275  
 1 -2.941896 1.399169 0.739155  
 1 -2.329459 -1.501970 -0.011925  
 6 -0.757613 -0.110888 0.455687  
 6 -0.187485 1.054463 0.950832  
 6 1.206010 1.013530 0.891690  
 6 1.715288 -0.160212 0.370556  
 1 -0.767241 1.880476 1.341256  
 6 2.348424 1.929488 1.272031  
 6 3.565012 1.116956 0.890217  
 6 4.947644 1.279087 0.925082  
 6 5.606984 0.163036 0.419420  
 6 3.151615 -0.096136 0.369765  
 1 5.474719 2.147566 1.292703  
 9 2.296001 3.119405 0.611466  
 9 2.333876 2.243821 2.597568  
 16 0.471814 -1.243586 -0.064230

16 4.468382 -1.073234 -0.089546  
 6 9.318005 0.346128 0.411900  
 6 8.023730 0.827525 0.680262  
 6 8.959423 2.853558 1.262261  
 6 10.169764 2.071454 1.702993  
 6 9.330983 -0.900988 -0.224743  
 6 7.012856 -0.044210 0.296192  
 1 9.102712 3.251478 0.252470  
 1 10.025301 1.666421 2.709123  
 1 13.230779 -4.732257 -1.194267  
 16 7.683374 -1.475514 -0.411407  
 8 7.797452 2.015660 1.275338  
 8 10.419759 0.981289 0.802498  
 1 8.756455 3.671853 1.951295  
 1 11.065769 2.689702 1.682005  
 16 12.173044 -4.111702 -0.641970  
 16 14.200875 -2.207945 -1.731487

**HJ10**

6 -7.202843 0.943058 -0.085103  
 6 -8.253716 1.738293 -0.558009  
 6 -9.389046 0.933539 -0.670264  
 6 -9.049359 -0.364582 -0.268278  
 7 -7.713913 -0.328934 0.083678  
 6 -7.005464 -1.365744 0.615714  
 6 -7.698455 -2.576740 0.837845  
 6 -6.992243 -3.626395 1.438732  
 6 -5.673024 -3.441466 1.821241  
 6 -5.006686 -2.243394 1.580478  
 6 -5.642463 -1.171138 0.936635  
 6 -5.029214 0.121450 0.634515  
 6 -5.836178 1.167142 0.198123  
 6 -9.749152 -1.598131 -0.104216  
 6 -9.073554 -2.656580 0.442591  
 6 -5.325229 2.541295 -0.047757  
 6 -11.166297 -1.708566 -0.501360  
 6 -5.138278 3.014993 -1.350796  
 6 -4.677717 4.299158 -1.582433  
 6 -4.399452 5.150991 -0.509603  
 6 -4.590974 4.697932 0.795161  
 6 -5.051643 3.401731 1.012121  
 6 -11.621108 -1.210562 -1.730569  
 6 -12.942632 -1.347176 -2.112754  
 6 -13.858541 -1.983157 -1.269275  
 6 -13.426482 -2.482194 -0.040820  
 6 -12.092393 -2.341005 0.327804  
 8 -3.954146 6.387576 -0.832171  
 8 -15.129621 -2.064722 -1.724905  
 6 -3.654485 7.284012 0.222387  
 6 -16.091595 -2.707329 -0.907900

6 -3.600950 0.362426 0.715119  
 6 -2.590579 -0.529364 0.590573  
 6 12.443849 -1.315234 -0.444664  
 6 13.586966 -0.547738 -0.530663  
 6 14.913503 -1.114037 -0.688778  
 6 13.509820 0.871845 -0.466288  
 7 13.394563 2.021126 -0.408165  
 1 -8.177318 2.789550 -0.791764  
 1 -10.368972 1.246309 -0.996961  
 1 -7.494960 -4.570636 1.620478  
 1 -5.144067 -4.244704 2.323702  
 1 -3.989541 -2.134934 1.930208  
 1 -9.584697 -3.605275 0.571966  
 1 -5.349567 2.363875 -2.193261  
 1 -4.525074 4.663288 -2.592764  
 1 -4.391172 5.338031 1.645466  
 1 -5.200855 3.059229 2.031680  
 1 -10.922161 -0.731504 -2.408193  
 1 -13.287320 -0.971600 -3.070238  
 1 -14.114094 -2.970808 0.638260  
 1 -11.773362 -2.718577 1.294245  
 1 -3.312279 8.202296 -0.252301  
 1 -4.542214 7.497949 0.826964  
 1 -2.859801 6.890365 0.864841  
 1 -17.029591 -2.665509 -1.459311  
 1 -15.823859 -3.753623 -0.726983  
 1 -16.210698 -2.188573 0.049100  
 1 12.586883 -2.392221 -0.500570  
 1 16.321615 -2.917405 -0.905341  
 1 -3.328071 1.410386 0.795122  
 1 -2.804538 -1.576782 0.406530  
 6 -1.197033 -0.168721 0.616500  
 6 -0.584119 1.044547 0.902686  
 6 0.805711 0.957160 0.802110  
 6 1.271689 -0.295393 0.451657  
 1 -1.130698 1.937759 1.175979  
 6 1.981235 1.889971 0.987745  
 6 3.166371 1.001027 0.689580  
 6 4.554439 1.127504 0.654328  
 6 5.170471 -0.068332 0.311555  
 6 2.708743 -0.267557 0.383107  
 1 5.102517 2.033110 0.879876  
 9 1.921739 2.969672 0.152667  
 9 2.031034 2.411805 2.249940  
 16 -0.010168 -1.399272 0.235685  
 16 3.989403 -1.334443 0.031854  
 6 6.575936 -0.311670 0.164978  
 6 7.576256 0.642904 0.103110  
 6 8.840596 0.053445 -0.030092  
 6 8.821793 -1.347555 -0.080067

6 11.089928 -0.963385 -0.295089  
6 10.076146 -1.923702 -0.228660  
1 7.387827 1.707187 0.133571  
1 10.280612 -2.985184 -0.288748  
16 7.203284 -1.946091 0.065354  
16 10.441613 0.672156 -0.169754  
16 16.273783 -0.180584 -0.793290  
16 14.984634 -2.872949 -0.763270

### HJ11

6 -8.130839 0.701408 -0.213290  
6 -9.272259 1.383793 -0.648584  
6 -10.340894 0.483812 -0.654029  
6 -9.865856 -0.764175 -0.236422  
7 -8.517787 -0.602293 0.026599  
6 -7.679953 -1.573076 0.491825  
6 -8.243262 -2.839782 0.764913  
6 -7.399112 -3.825518 1.290858  
6 -6.069379 -3.530711 1.549046  
6 -5.532681 -2.279717 1.261669  
6 -6.315697 -1.261779 0.695340  
6 -5.851210 0.085746 0.376675  
6 -6.767558 1.046807 -0.030099  
6 -10.440422 -2.051104 -0.007637  
6 -9.634958 -3.040786 0.488233  
6 -6.379938 2.442931 -0.341451  
6 -11.869303 -2.290781 -0.290307  
6 -5.460967 2.736111 -1.357642  
6 -5.121018 4.042379 -1.658325  
6 -5.688937 5.099966 -0.941657  
6 -6.606052 4.827831 0.073319  
6 -6.946442 3.508362 0.356653  
6 -12.460491 -1.863840 -1.487737  
6 -13.790857 -2.123016 -1.760705  
6 -14.578809 -2.814718 -0.835827  
6 -14.010152 -3.244770 0.362560  
6 -12.668813 -2.980445 0.620853  
8 -5.292249 6.342120 -1.300882  
8 -15.869741 -3.016649 -1.186772  
6 -5.839314 7.445963 -0.602047  
6 -16.704159 -3.720289 -0.284366  
6 -4.458532 0.485820 0.512593  
6 -3.358023 -0.260842 0.275171  
6 5.756947 0.883636 0.295035  
6 6.652533 1.933905 0.324956  
6 7.979731 1.485907 0.215024  
6 8.103027 0.101389 0.087610  
16 6.557994 -0.666321 0.132486  
6 10.331500 0.780191 -0.005533  
6 9.439785 -0.307487 -0.039344

6 11.670196 0.423693 -0.123001  
6 11.831003 -0.956978 -0.248761  
16 10.274436 -1.790447 -0.217292  
6 12.980323 -1.761808 -0.390653  
6 14.314604 -1.415239 -0.449245  
6 15.382373 -2.387277 -0.600549  
6 14.712627 -0.051757 -0.364133  
7 14.970304 1.073033 -0.288573  
1 -9.303449 2.425828 -0.928290  
1 -11.362492 0.701587 -0.925458  
1 -7.801682 -4.809411 1.508403  
1 -5.428720 -4.288871 1.987588  
1 -4.497427 -2.087844 1.506781  
1 -10.049159 -4.029075 0.660570  
1 -5.015712 1.925835 -1.925807  
1 -4.414469 4.266593 -2.450204  
1 -7.058086 5.626270 0.648518  
1 -7.658766 3.308887 1.151033  
1 -11.861290 -1.343429 -2.227511  
1 -14.240802 -1.802293 -2.694182  
1 -14.597326 -3.774330 1.102456  
1 -12.242737 -3.306163 1.564642  
1 -5.390376 8.333675 -1.044798  
1 -6.926908 7.492147 -0.720963  
1 -5.588250 7.405889 0.463079  
1 -17.682638 -3.772961 -0.759200  
1 -16.332029 -4.734966 -0.107652  
1 -16.792926 -3.190992 0.670184  
1 6.351796 2.970201 0.399194  
1 12.494911 1.122084 -0.119034  
1 12.772987 -2.827144 -0.466312  
1 16.124247 -4.550261 -0.824852  
1 -4.312135 1.529987 0.777958  
1 -3.463071 -1.276560 -0.093873  
6 -2.007511 0.221095 0.418172  
6 -1.525874 1.407344 0.953388  
6 -0.131275 1.474969 0.888169  
6 0.463792 0.365274 0.322441  
1 -2.164515 2.170879 1.378238  
6 0.942343 2.458325 1.296241  
6 2.216159 1.757988 0.883037  
6 3.588781 2.012344 0.944272  
6 4.326409 0.967709 0.411531  
6 1.894927 0.538842 0.320521  
1 4.042297 2.896426 1.373514  
9 0.795427 3.669946 0.680709  
9 0.912863 2.728892 2.635881  
16 -0.696201 -0.791704 -0.149264  
16 3.285497 -0.319519 -0.165422  
16 9.513393 2.311527 0.179988



16 14.874776 -4.071395 -0.686322  
16 16.973441 -1.948163 -0.686101

## HJ12

6 -8.396663 0.641688 -0.284883  
6 -9.537214 1.278690 -0.786095  
6 -10.595658 0.367362 -0.748952  
6 -10.114759 -0.843306 -0.238702  
7 -8.773654 -0.647276 0.036658  
6 -7.933973 -1.574066 0.581456  
6 -8.488126 -2.826172 0.930208  
6 -7.642727 -3.763385 1.536693  
6 -6.321195 -3.435442 1.797325  
6 -5.793207 -2.200442 1.434743  
6 -6.577168 -1.233055 0.786955  
6 -6.121655 0.095125 0.385133  
6 -7.040537 1.015156 -0.102170  
6 -10.679160 -2.118750 0.066979  
6 -9.872242 -3.062611 0.643263  
6 -6.662035 2.390835 -0.502648  
6 -12.099947 -2.394248 -0.223890  
6 -5.725080 2.623631 -1.518093  
6 -5.394390 3.909730 -1.903976  
6 -5.990240 5.007757 -1.276348  
6 -6.925256 4.795968 -0.263347  
6 -7.255636 3.495472 0.106371  
6 -12.673398 -2.057095 -1.458023  
6 -13.996037 -2.348803 -1.735610  
6 -14.793916 -2.983822 -0.779137  
6 -14.242702 -3.325224 0.455410  
6 -12.908911 -3.029020 0.718280  
8 -5.601331 6.226570 -1.715358  
8 -16.076489 -3.222545 -1.137610  
6 -6.178790 7.369605 -1.110285  
6 -16.921399 -3.868270 -0.202301  
6 -4.735324 0.518676 0.517873  
6 -3.625295 -0.231121 0.343204  
6 5.479766 1.001082 0.392555  
6 6.380401 2.052651 0.486386  
6 7.721012 1.659122 0.357567  
6 7.837742 0.286085 0.155382  
16 6.308575 -0.511193 0.144465  
6 10.208270 0.707263 0.063762  
6 9.161499 -0.231137 -0.005319  
6 11.448954 0.107530 -0.102504  
6 11.390137 -1.281244 -0.300376  
16 9.715632 -1.822922 -0.271817  
6 9.737840 3.595188 -1.068790  
6 9.930881 3.159247 2.002804

6 12.383085 -2.253286 -0.507394  
6 13.761035 -2.131205 -0.571251  
6 14.644759 -3.254063 -0.799330  
6 14.384172 -0.863128 -0.409141  
7 14.834659 0.193230 -0.270304  
1 -9.574830 2.298732 -1.136988  
1 -11.614333 0.553617 -1.052858  
1 -8.038032 -4.735182 1.813704  
1 -5.680305 -4.154231 2.297493  
1 -4.764637 -1.979382 1.683674  
1 -10.278866 -4.041929 0.874856  
1 -5.258458 1.781229 -2.018301  
1 -4.674011 4.086590 -2.695393  
1 -7.399225 5.627064 0.243891  
1 -7.982363 3.343444 0.898202  
1 -12.065911 -1.582127 -2.221227  
1 -14.432152 -2.097620 -2.696546  
1 -14.837722 -3.810056 1.219355  
1 -12.496744 -3.284725 1.689423  
1 -5.731644 8.229708 -1.606157  
1 -7.263895 7.390833 -1.255957  
1 -5.951725 7.410044 -0.039807  
1 -17.890852 -3.962941 -0.688990  
1 -16.544754 -4.864611 0.051912  
1 -17.031110 -3.273807 0.710811  
1 6.055197 3.076270 0.626488  
1 12.387394 0.645240 -0.085889  
1 10.793465 3.877811 -1.125039  
1 9.150107 4.508084 -0.932153  
1 9.451100 3.138124 -2.019198  
1 10.990250 3.433387 2.004944  
1 9.346847 4.063960 2.197490  
1 9.755118 2.451891 2.817157  
1 12.003040 -3.264288 -0.637023  
1 -4.602646 1.578643 0.720769  
1 -3.717524 -1.268071 0.034330  
6 -2.280642 0.268784 0.478185  
6 -1.814734 1.483668 0.960406  
6 -0.420036 1.560080 0.908131  
6 0.190697 0.429148 0.403877  
1 -2.464827 2.260929 1.340621  
6 0.641388 2.570437 1.280290  
6 1.925334 1.861585 0.915716  
6 3.294439 2.132618 0.974849  
6 4.048624 1.071261 0.497921  
6 1.619827 0.614397 0.408643  
1 3.733663 3.043952 1.359490  
9 0.492524 3.750026 0.605376  
9 0.594218 2.905470 2.604976  
16 -0.954400 -0.759128 -0.024046

16 3.023444 -0.252982 -0.022115  
14 9.455229 2.419518 0.354940  
16 16.292169 -3.097867 -0.860461  
16 13.856607 -4.817159 -1.013199  
1 15.008732 -5.492876 -1.172161

### HJ13

6 -9.506180 0.675034 -0.291432  
6 -10.607472 1.380341 -0.789067  
6 -11.722282 0.539835 -0.735145  
6 -11.316296 -0.695053 -0.217868  
7 -9.962946 -0.584145 0.044559  
6 -9.180207 -1.559001 0.590282  
6 -9.811033 -2.769801 0.954208  
6 -9.022488 -3.755377 1.560689  
6 -7.680079 -3.511979 1.806829  
6 -7.076779 -2.316296 1.430210  
6 -7.802500 -1.304865 0.781957  
6 -7.266025 -0.011350 0.367527  
6 -8.127629 0.962062 -0.121056  
6 -11.959597 -1.928234 0.104682  
6 -11.210328 -2.917815 0.682067  
6 -7.664635 2.308116 -0.533104  
6 -13.398207 -2.112697 -0.170207  
6 -6.719409 2.474298 -1.553978  
6 -6.308685 3.734225 -1.949265  
6 -6.829928 4.871911 -1.325917  
6 -7.772194 4.726532 -0.307964  
6 -8.183671 3.452209 0.071230  
6 -13.960248 -1.751608 -1.402802  
6 -15.301684 -1.959331 -1.665407  
6 -16.130047 -2.530769 -0.694846  
6 -15.590650 -2.893756 0.538738  
6 -14.237863 -2.682832 0.786309  
8 -6.365425 6.060717 -1.773584  
8 -17.428763 -2.689514 -1.039293  
6 -6.865038 7.241902 -1.172401  
6 -18.304639 -3.269762 -0.089640  
6 -5.855531 0.325647 0.491922  
6 -4.792951 -0.490735 0.320161  
6 4.365621 0.267359 0.307027  
6 5.316787 1.275072 0.375509  
6 6.633701 0.812177 0.236445  
6 6.682734 -0.567336 0.054699  
16 5.117134 -1.287299 0.074053  
6 9.071167 -0.264325 -0.053146  
6 7.979954 -1.150094 -0.110311  
6 10.282088 -0.920801 -0.226538  
6 10.154740 -2.305129 -0.415483  
16 8.456867 -2.766364 -0.371954

6 11.098447 -3.324953 -0.631054  
6 12.479284 -3.270533 -0.698358  
6 13.305599 -4.433299 -0.948271  
6 13.165605 -2.038284 -0.514648  
7 13.668046 -1.008752 -0.355266  
1 -10.582137 2.397754 -1.148567  
1 -12.729404 0.789057 -1.032425  
1 -9.477300 -4.697418 1.849008  
1 -7.082372 -4.267213 2.306765  
1 -6.033905 -2.160224 1.668412  
1 -11.677646 -3.866410 0.926548  
1 -6.309957 1.600690 -2.050707  
1 -5.582018 3.859821 -2.744692  
1 -8.189496 5.589381 0.195956  
1 -8.914955 3.351786 0.867053  
1 -13.330419 -1.325202 -2.176519  
1 -15.729740 -1.690395 -2.625172  
1 -16.208981 -3.329590 1.313600  
1 -13.833969 -2.954464 1.756598  
1 -6.365379 8.068620 -1.674866  
1 -7.947136 7.332569 -1.313723  
1 -6.631164 7.273331 -0.103052  
1 -19.282663 -3.306976 -0.566869  
1 -17.990394 -4.285574 0.172365  
1 -18.367436 -2.659964 0.817753  
1 5.045387 2.315778 0.503254  
1 11.243963 -0.426013 -0.221721  
1 10.668098 -4.314922 -0.765048  
1 -5.657236 1.376792 0.686653  
1 -4.946374 -1.521844 0.016314  
6 -3.421607 -0.067954 0.451690  
6 -2.889286 1.116475 0.940764  
6 -1.492990 1.119708 0.880030  
6 -0.945582 -0.037432 0.362830  
1 -3.495082 1.923496 1.332138  
6 -0.378523 2.070420 1.253897  
6 0.864429 1.300114 0.872795  
6 2.246004 1.501245 0.921321  
6 2.940843 0.408119 0.427122  
6 0.491522 0.074538 0.357900  
1 2.734553 2.384634 1.311538  
9 -0.471308 3.262687 0.591515  
9 -0.399511 2.393955 2.582036  
16 -2.154665 -1.161242 -0.065875  
16 1.845931 -0.857763 -0.094942  
14 8.400859 1.482927 0.209598  
6 8.696274 2.635556 -1.235440  
6 9.862999 3.409090 -1.302753  
6 7.785695 2.709585 -2.297306  
6 10.112767 4.228290 -2.398172

|   |           |          |           |
|---|-----------|----------|-----------|
| 1 | 10.585446 | 3.376984 | -0.491650 |
| 6 | 8.032589  | 3.530516 | -3.392635 |
| 1 | 6.871797  | 2.122625 | -2.269147 |
| 6 | 9.197066  | 4.289894 | -3.444233 |
| 1 | 11.021712 | 4.820168 | -2.434859 |
| 1 | 7.314964  | 3.578655 | -4.205456 |
| 1 | 9.390461  | 4.931062 | -4.298317 |
| 6 | 8.960606  | 2.229832 | 1.832079  |
| 6 | 8.789709  | 3.598126 | 2.082117  |
| 6 | 9.513106  | 1.432111 | 2.842298  |
| 6 | 9.156053  | 4.150793 | 3.304433  |

|    |           |           |           |
|----|-----------|-----------|-----------|
| 1  | 8.371664  | 4.243669  | 1.314371  |
| 6  | 9.882285  | 1.983392  | 4.064585  |
| 1  | 9.662269  | 0.369398  | 2.672936  |
| 6  | 9.703049  | 3.343332  | 4.296948  |
| 1  | 9.018044  | 5.212672  | 3.481344  |
| 1  | 10.313413 | 1.351835  | 4.834740  |
| 1  | 9.992859  | 3.774709  | 5.249768  |
| 16 | 14.958318 | -4.359627 | -0.999206 |
| 16 | 12.438191 | -5.946875 | -1.204070 |
| 1  | 13.554506 | -6.681394 | -1.357902 |
